## 22 **Abstract**

23 The evolution of the interferon (IFN) system, the major innate antiviral mechanism of  
24 vertebrates, remains poorly understood. According to the detection of type I IFN genes in  
25 cartilaginous fish genomes, the system appeared 500My ago. However, the IFN system  
26 integrates many other components, most of which are encoded by IFN-stimulated genes  
27 (ISGs). To shed light on its evolution, we have used deep RNA sequencing to generate a  
28 comprehensive list of ISGs of zebrafish, taking advantage of the high quality genome  
29 annotation in this species. We analyzed larvae after inoculation of recombinant zebrafish  
30 type I IFN, or infection with chikungunya virus, a potent IFN inducer. We identified more  
31 than 400 zebrafish ISGs, defined as being either directly induced by IFN or induced by the  
32 virus in an IFN receptor-dependent manner. Their human orthologues were highly enriched  
33 in ISGs, particularly for highly-inducible genes. We identified 72 orthology groups containing  
34 ISGs in both zebrafish and human, revealing a core ancestral ISG repertoire, which includes  
35 most of the known signaling components of the IFN system. Many downstream effectors  
36 were also already present 450 My ago in the common ancestor of tetrapods and bony fish,  
37 and diversified as multi-gene families independently in the two lineages. A large proportion  
38 of the ISG repertoire is lineage-specific; around 40% of protein-coding zebrafish ISGs had no  
39 human orthologue. We identified 14 fish-specific gene families containing multiple ISGs,  
40 including finTRIMs. This work illuminates the evolution of the IFN system and provides a rich  
41 resource to explore new antiviral mechanisms.

42

## 43 **Key points**

- 44 • We established an exhaustive list of larval zebrafish ISGs.
- 45 • Orthologous ISGs in fish and human identify a large ancestral ISG repertoire.

## 46 **Introduction**

47

48 All living organisms are targeted by viruses, and evolution has given rise to various antiviral  
49 strategies. Vertebrates possess many unique immune features, including their principal  
50 innate antiviral system based on signaling by type I interferons (IFNs). Type I IFNs induce the  
51 expression of hundreds of proteins encoded by ISGs (IFN-stimulated genes), making cells  
52 refractory to viral infection (1). The origin of the IFN system, which seems to have replaced  
53 the RNA interference antiviral system still used by plants and most invertebrates (2, 3), is  
54 shrouded in mystery. Cartilaginous fish are the most basal clade with genomes containing  
55 recognizable type I IFN genes (4, 5), suggesting that this system appeared about 500My ago  
56 with jawed vertebrates. The IFN system integrates many components, most of which are  
57 encoded by ISGs, which can be traced back in genomes from distant clades. However,  
58 finding the orthologue(s) of a human ISG in another taxon does not imply that this gene is  
59 part of its IFN system. To understand the evolution of antiviral immunity, it is therefore  
60 desirable to establish how the repertoire of ISGs changed from early to modern vertebrates.  
61 This can be inferred by comparing the ISGs of current living representatives of distant  
62 vertebrate taxa.

63 Bony fishes (hereafter simply called “fish”) diverged from the tetrapod lineage about 450My  
64 ago, and, since viral infections are a major problem in aquaculture, their IFN system has  
65 been the subject of many studies, as reviewed in (6–9). Teleost fish possess several  
66 subgroups of type I IFNs (but no type III genes), with strong variation in gene numbers  
67 among fish taxa (8). The zebrafish possess four type I IFN genes, named *ifnphi1-4*; only  
68 *ifnphi1* and *ifnphi3* are active at the larval stage (10). Their receptors have been identified  
69 (10). Even before fish IFNs were known, the first fish ISGs were identified by homology

70 cloning from cells stimulated by poly-I:C (11) or by differential transcript analysis of cells  
71 infected by viruses (12, 13). Because many virus-induced genes (*vig*) were homologous to  
72 well-known mammalian ISGs, they were hypothesized to be IFN-inducible, which was often  
73 confirmed by later studies, as in the case of *vig-1*, the *rsad2/viperin* orthologue (12, 14).  
74 Similarly, upon cloning of fish IFNs, induction of *Mx* (11) was used as a readout for their  
75 activity (15–17), confirming it was an ISG. The list of fish homologues of known ISGs rapidly  
76 grew with the release of new fish genomes and EST collections, allowing the development of  
77 micro-arrays to study fish response to virus or recombinant type I IFNs (18, 19). Candidate  
78 gene approaches were also developed, testing orthologues of known mammalian ISGs in  
79 qRT-PCR assays in multiple fish infection models (14, 20, 21). In parallel, approaches without  
80 a priori identified fish ISGs that had no orthologue in mammals, although they belonged to  
81 gene families involved in antiviral immunity. A large set of tripartite-motif protein-encoding  
82 genes, called *fintrims* (*ftr*), distantly related to *trim25* was identified in rainbow trout cells as  
83 a induced by virus infection (13) and later shown to form multigene families in teleosts,  
84 particularly extensive in zebrafish (22). Similarly, a family of IFN induced ADP-  
85 ribosyltransferases named *Gig2* was identified in crucian carp cells treated with UV-  
86 inactivated GCHV (grass carp hemorrhage virus) (23, 24). Some ISG were restricted to  
87 particular fish groups such as the non-coding RNA *vig2* that is found only in salmonids (25).

88

89 We previously established a list of zebrafish candidate ISGs using microarray analysis (26).  
90 For this, we compared the response to a poor IFN inducer, IHNV (infectious hematopoietic  
91 necrosis virus) (27) and a strong IFN inducer, CHIKV (chikungunya virus) (28). However, the  
92 array did not include the full complement of zebrafish genes, and the study identified virus-  
93 induced genes which were not necessarily ISGs. Here, to directly identify ISGs, we analyze

94 the transcriptional response of zebrafish larvae injected with recombinant type I IFN. We  
95 rely on deep RNA sequencing, which is intrinsically quasi-exhaustive. Our approach is  
96 therefore limited mainly by the quality of genome assembly and annotation, which is  
97 excellent for the zebrafish (29). We complemented this analysis with a study of the response  
98 to CHIKV and its dependence to expression of the zebrafish IFN receptor chains *crfb1* and  
99 *crfb2* (10). We thus established a comprehensive list of ISGs of zebrafish larvae, and  
100 performed a detailed comparison with the human ISG repertoire. Our comparative analysis  
101 was facilitated by a compilation of human ISGs made to perform a systematic screen (30),  
102 and by the specialized database Interferome (31). We identify about 70 orthology groups  
103 that include ISG in both species and thus approximate the ISG repertoire of the common  
104 ancestor of all Osteichthyes. As ISGs typically evolve fast, with frequent duplications and  
105 gene loss, we also identify many families of fish-specific ISGs, which represent a rich  
106 resource for seeking new antiviral mechanisms. Our study provides a broad overview of the  
107 evolutionary patterns of genes belonging to the type I IFN pathway, and identifies gene  
108 modules induced by a viral infection independently of IFN.

109

110

111

## 112 **Materials and methods**

113

### 114 *Zebrafish husbandry*

115 Wild-type AB zebrafish, initially obtained from the Zebrafish International Resource Center  
116 (Eugene, OR, USA), were raised in the Institut Pasteur facility. Animal experiments were  
117 performed according to European Union guidelines for handling of laboratory animals  
118 ([http://ec.europa.eu/environment/chemicals/lab\\_animals/home\\_en.htm](http://ec.europa.eu/environment/chemicals/lab_animals/home_en.htm)) and were  
119 approved by the Institut Pasteur Animal Care and Use Committee. Eggs were obtained by  
120 marble-induced spawning, cleaned by treatment with 0.003% bleach for 5 minutes, and then  
121 kept in Petri dishes containing Volvic source water at 28°C. All timings in the text refer to the  
122 developmental stage at the reference temperature of 28.5°C. At 3 dpf (days post  
123 fertilization), shortly before injections, larvae that had not hatched spontaneously were  
124 manually dechorionated. Larvae were anesthetized with 200 µg/ml tricaine (A5040, Sigma-  
125 Aldrich) during the injection procedure.

126

### 127 *Interferon and virus inoculation*

128 Recombinant zebrafish IFN $\phi$ 1 (10), kindly provided by Rune Hartmann (University of Aarhus,  
129 Denmark), was inoculated by intravenous (IV) injection in the caudal cardinal vein. One  
130 nanoliter of 1mg/ml IFN $\phi$ 1, or as a control, bovine serum albumin (BSA, New England  
131 Biolabs) in PBS1x/10% glycerol was injected. CHIKV infections were performed as described  
132 (26, 28). Briefly, ~200PFU of CHIKV115 was injected IV in a volume of 1 nl at 3dpf.

133

### 134 *Interferon receptor knock-down*

135 Morpholino antisense oligonucleotides (Gene Tools) were injected at the one to two cells  
136 stage as described (32). Two ng of *crfb1* splice morpholino  
137 (CGCCAAGATCATACCTGTAAAGTAA) was injected together with 2ng of *crfb2* splice  
138 morpholino (CTATGAATCCTCACCTAGGGTAAAC), knocking down all type I IFN receptors (10).  
139 Control morphants were injected with 4 ng of control morpholino  
140 (GAAAGCATGGCATCTGGATCATCGA) with no known target.

141

#### 142 *RNA extraction*

143 For RNAseq analysis, total RNA was extracted from replicate pools of 10 injected larvae (at 6  
144 hours post injection for IFN $\phi$ 1 treatment, or 24 hours post injection for CHIKV infections),  
145 using TRIzol (Invitrogen), following the manufacturer's protocol. The integrity of the RNA  
146 was confirmed by laboratory-on-chip analysis using the 2100 Bioanalyzer (Agilent  
147 Technologies), using only samples with an RNA integrity number of at least 8.

148

#### 149 *Illumina sequencing*

150 Libraries were built using a Truseq mRNA-Seq Library Preparation Kit (Illumina, USA),  
151 according to the manufacturer's recommendations. Quality control was performed on an  
152 Agilent Bioanalyzer. Sequencing was performed on a HiSeq 2500 system (Illumina, USA) and  
153 produced 65-base single-end reads.

154

#### 155 *Mapping reads and gene expression counts*

156 Sequences were trimmed using cutadapt (v1.8.3). The reads quality was checked with  
157 FastQC. Reads were then spliced-aligned to the zebrafish genome (GRCz10, Ensembl release  
158 88) using TopHat2 (v2.0.14). The average number of mapped read per sample was

159 16.500.000. Only fragments mapping coherently and unambiguously to genes have been  
160 considered for gene counts. Gene counts have been assigned using featureCounts v1.5.2  
161 (Liao, 2014).

162

### 163 *Identification of differentially expressed genes (DEG)*

164 Differentially expressed nuclear genes between larvae treated with IFN $\phi$ 1 and  
165 controls, between larvae infected by CHIKV and controls, or between crfb1+2 and control  
166 morphants all infected by CHIKV, were identified. DEG were identified using DESeq 1.18.0  
167 (BioConductor) (Love et al., 2014) and R: 3–1-2 (R core team, 2017). Briefly, raw counts of  
168 genes were subjected to a minimal pre-filtering step: genes for which the count sum, per  
169 group of samples, was equal or higher than 10, in at least one group, were kept. Raw counts  
170 were normalized for library size and normalized data were fitted using a negative binomial  
171 general linear model. Data were adjusted for multiple testing using the Benjamini-Hochberg  
172 procedure (adjusted  $p$  value). Genes with an adjusted  $p$  value less than 0.01 and an absolute  
173 Fold Change (FC)  $> 2$  or FC  $< 0.5$  were considered as DEGs.

174 Sequence data were registered in the BioProject ncbi database  
175 (<https://www.ncbi.nlm.nih.gov/bioproject>) with the SRA accession number: PRJNA531581.

176

### 177 *Identification of human orthologues and ISGs*

178 Orthology analysis was primarily based on data from the Ensembl database  
179 ([www.ensembl.org](http://www.ensembl.org)), the zfin database ([zfin.org](http://zfin.org)), and the literature, notably our previous  
180 analysis of zebrafish orthologues of human ISGs (26). Data were systematically curated  
181 manually, and conflicts resolved using a combination of literature search, synteny analysis,  
182 and sequence homology analysis (two-way protein BLAST). When human genes were



183 present on the list compiled by Schoggins *et al.* (30), they were labelled as ISGs. If absent  
184 from the list, gene names were further queried on the Interferome website  
185 (<http://www.interferome.org/interferome/search/showSearch.aspx>) which compiles the  
186 results of many transcriptomic studies on human and mouse samples after IFN stimulation  
187 (31). We postulated that human genes present in Interferome could be considered as ISG  
188 when being significantly induced at least 2-fold with a stimulation for no more 12 hours by  
189 type I IFN in at least 4 datasets.

190

191 *qRTPCR*

192 RNA was extracted from individual larvae using RNeasy® Mini Kit (Qiagen). cDNA was  
193 obtained using M-MLV H- reverse-transcriptase (Promega) with a dT17 primer. Quantitative  
194 PCR was then performed on an ABI7300 thermocycler (Applied Biosystems) using Takyon™  
195 ROX SYBR© 2x MasterMix (Eurogentec) in a final volume of 25 µl. The following pairs of  
196 primers were used: *ef1a* (housekeeping gene used for normalization): 5'-  
197 GCTGATCGTTGGAGTCAACA-3' and 5'-ACAGACTTGACCTCAGTGGT-3'; *mx1*: 5'-  
198 GACCGTCTCTGATGTGGTTA-3' and 5'-GCATGCTTTAGACTCTGGCT-3'; *ddx58*: 5'-  
199 ACGCCGGAGAAAGAATTTTTC-3' and 5'-TCGACAGACTCTCGATGTTG-3'; *aqp9a*: 5'-  
200 CTGTACTACGACGCCTTCAT -3' and 5'-GAGAATACAGAGCACCAGCA -3'.

201

202

203

## 204 **Results**

205

### 206 *RNAseq analysis of IFN $\phi$ 1-regulated genes*

207 To make an inventory of zebrafish ISGs, we first injected 3dpf larvae with  
208 recombinant zebrafish IFN $\phi$ 1, the first type I IFN to be identified in zebrafish, or BSA as a  
209 negative control. Based on preliminary kinetic experiments, we chose 6 hours post injection  
210 as the early plateau phase of ISG expression (Figure S1A). RNA was extracted from multiple  
211 pools of ten larvae and subjected to deep sequencing using an Illumina-based platform  
212 sequencing. Reads were mapped to zebrafish genome (zv10), and the differential analysis  
213 performed using the DESeq package.

214 Choosing as cutoff values adjusted  $p$  values <5% and fold-change (FC) >2, we  
215 identified 360 IFN $\phi$ 1 up-regulated genes (which are ISGs, by definition) and 75 down-  
216 regulated genes (Table S1). As expected, genes with high basal expression levels tended to  
217 display lower fold-change (Figure 1A). The top IFN $\phi$ 1-upregulated genes (with FC >100)  
218 comprised many well-known ISGs, many previously used as IFN signature genes in zebrafish,  
219 including several *mx* genes, *rsad2*, *cmpk2*, several *ifit* genes, the ubiquitin-like *isg15*, the  
220 helicase *dhx58* (aka *lgp2*), the kinase *pkz*, the transcription factor *stat1b*, and the chemokine  
221 *ccl19a.2* (Figure 1B). To our surprise, *ddx58* (encoding RIG-I), a well-known and conserved  
222 ISG (33), was not found in that list. In fact, the gene model is missing on the zebrafish  
223 reference genome, with only fragments of the sequence present in the assembly. Therefore,  
224 we performed qRT-PCR for *ddx58* and confirmed that it is induced by IFN $\phi$ 1 (Figure S1B). We  
225 searched the list of zebrafish orthologues of human ISGs (26) for more genes not annotated  
226 on the reference genome and found only one besides *ddx58*: *aqp9a*. By qRT-PCR, this gene

227 appeared to be moderately (0.75 fold) downregulated by IFN $\phi$ 1 (Figure S1B), and thus was  
228 not an ISG.

229 Among the 360 zebrafish ISGs identified by RNAseq, 23 corresponded to non-coding  
230 ISGs or transposons with no clear homologues in mammals, and were excluded from further  
231 phylogenetic analyses.

232 Gene ontology (GO) analysis was performed using David and Gorilla, and showed, as  
233 expected, that IFN $\phi$ 1 upregulated genes were strongly enriched in genes linked to “antiviral  
234 response”, “type I interferon pathway” and “antigen processing and presentation” (not  
235 shown). Similarly, enrichment analyses identified KEGG pathways for Influenza, Measles and  
236 Herpes simplex infection as well as RIG-I signaling and cytosolic DNA sensing pathways. The  
237 list of downregulated genes was not found associated with any particularly notable function  
238 in these analyses.

239

#### 240 *Human orthologues of zebrafish ISGs are enriched in ISGs*

241 We then searched for the human orthologues of the 337 identified protein-coding  
242 zebrafish ISGs (Table S2). All types of orthology relationships between zebrafish and human  
243 were observed, from none to “many-to-many”. One-to-one orthology was found for 77  
244 genes (Figure 1C). We identified one or several human orthologues for 200 zebrafish ISGs.  
245 This proportion (200/337, 59%) is significantly lower than the 71% reported for the whole  
246 genome (29) (Fisher’s exact test,  $p < 0.0001$ ).

247 We then searched which of these human genes were themselves ISGs. We found 61  
248 ISGs present in the list of 446 human ISGs compiled by Schoggins et al. (30); by querying the  
249 Interferome database (31), we identified 11 additional human ISGs (Table S2). In total, 97  
250 zebrafish IFN $\phi$ 1-inducible genes were orthologous to at least one human ISGs (Figure 1C). In

251 addition, we identified a handful of genes that were not true orthologues, but shared  
252 ancestry with a human ISG at the vertebrate level, such as MHC class I genes (see comments  
253 on [Table S2](#)).

254 As expected, human orthologues of zebrafish ISGs were strongly enriched in ISGs:  
255 while there are 446 human ISGs out of 20454 genes in the genome (i.e., 2%), we found 72  
256 ISGs among the 196 human orthologues to zebrafish ISGs (i.e., 37%) (Fisher's exact test,  $p <$   
257  $0.0001$ ). Interestingly, FC values of zebrafish ISGs were higher when they were orthologous  
258 to a human ISG than when their orthologues were not ISGs (red vs blue on [Figure 1C-D](#)),  
259 while FCs of zebrafish ISGs without human orthologues (grey on [Figure 1C-D](#)) were  
260 intermediate (mean values, 127.7, 10.6 and 46.9, respectively; all groups significantly  
261 different from each other,  $p < 0.001$ , Kruskal-Wallis test). Thus, inducibility by type I IFNs is  
262 often evolutionary conserved, making it possible to infer an ancestral set of ISGs.

263

#### 264 *Fish-specific ISG genes and families*

265 Consistent with the expected high rate of duplication and divergence of ISGs, a  
266 significant proportion of zebrafish IFN $\alpha$ 1-up-regulated protein-coding genes had no  
267 identifiable orthologue in the human genome (137/337; 41%). Interestingly, but not unlike  
268 genes with human orthologues, many of these genes belonged to multigenic families. We  
269 show on [Figure 2](#) the fish-specific gene families that contain several zebrafish ISGs, with  
270 domains identified by the SMART tool (34).

271 The genes listed on [Figure 2](#) included more than 20 *fintrim* (*ftr*) genes, a family  
272 identified first as virus-inducible genes in rainbow trout (13), highly diversified in zebrafish,  
273 and hypothesized to antagonize retroviruses (22). Of note, besides finTRIM, there are two  
274 other large TRIM gene expansions in zebrafish, each with a single human orthologue of

275 unknown function (35). The *btr* (bloodthirsty-like TRIMs), related to human TRIM39, include  
276 several ISGs. By contrast, no member of the TRIM35-like family was upregulated by IFN $\phi$ 1.

277 Another family had been described as virus-inducible in fish: *gig2* (GCRV-induced  
278 gene 2) genes (23). *gig2* genes are distantly related to the PARP family (24), which include  
279 several ISGs in humans and zebrafish. The zebrafish *gig2p* and *gig2o* genes are induced by  
280 IFN $\phi$ 1.

281 To our knowledge, the genes in the remaining fish-specific families had not previously  
282 been described to be interferon- or virus-inducible. These families are diverse, encoding  
283 proteins expected to be membrane receptors, and presumably secreted, nuclear, or  
284 cytosolic proteins (Figure 2).

285 Eight members of the very large NLR family were ISGs. These genes belong to groups  
286 1, 2, 3 and 4 as defined in (36), and two of them belong to a fish specific subset defined by  
287 the presence of a C-terminal B30.2 (or PRY-SPRY) domain (37, 38), which is most similar to  
288 the corresponding domain of finTRIM genes (22). The specific function(s) of zebrafish NLR  
289 genes remain poorly understood, but this highly expanded family may be central for  
290 inflammatory mechanisms.

291 Additionally, 3 ISGs corresponded to membrane proteins with two immunoglobulin  
292 (Ig) domains and a transmembrane region but not ITAM or ITIM (immunoreceptor tyrosine-  
293 based activating/inhibiting motif). These genes belong to a very large family with 140  
294 members, which we propose to name f2Ig (fish genes with two Ig domains).

295

#### 296 *RNAseq analysis of CHIKV-induced genes*

297 Experimental infection of zebrafish larvae with chikungunya virus (CHIKV) induces a  
298 strong type I IFN response (28). Our previous microarray-based analysis indicated that the

299 response to CHIKV was dominated by ISGs (26). However, to allow comparison with another  
300 virus with slower IFN induction kinetics, this analysis had been performed at 48 hours post  
301 infection (hpi), while the peak of the IFN and ISG response, as determined by qRT-PCR, is at  
302 24 hpi (26). Therefore, we re-analyzed here the transcriptome of CHIKV-infected larvae at  
303 24 hpi using deep RNA sequencing. Choosing the same cutoff values as for the IFN $\phi$ 1  
304 analysis, we identified 466 CHIKV up-regulated genes and 26 down-regulated genes (Table  
305 S3). Hundreds of new CHIKV-inducible genes were identified, either because they were  
306 absent from the microarray, or because their induction were below the cutoff of the first  
307 analysis. Among the genes significantly upregulated in the microarray study, all those with a  
308 human ISG orthologue were also upregulated in this new dataset, and, as expected, typically  
309 much more (Figure S2).

310 About half of genes induced by IFN $\phi$ 1 were also induced by the viral infection  
311 (181/360 Figure 3A; Table S3, yellow), including almost all (84 out of 97) genes orthologous  
312 to a human ISG, such as *mx $\alpha$* , *b* and *e*, *stat1a* and *b*; *stat2*; *rasd2*, *isg15*, etc. There was a  
313 clear correlation of the FC values for genes induced by both IFN $\phi$ 1 and CHIKV (Figure 3B).  
314 However, almost two thirds of the genes induced by CHIKV infection were not significantly  
315 modulated by IFN $\phi$ 1 (285/466; Figure 3A). We then asked whether this CHIKV-specific  
316 response could correspond essentially to genes for which there was weak induction by  
317 recombinant IFN $\phi$ 1, below our arbitrary cutoff. We therefore extracted from this list genes  
318 induced by IFN $\phi$ 1 with FC>1.5 and with an adjusted *p* value<20%, and we found 66 genes  
319 matching these conditions (Table S3, green): 21 genes without annotation and 45 annotated  
320 genes, many of which were notoriously linked to the type I IFN system. These genes notably  
321 comprised *crfb1*, encoding a type I IFN receptor subunit, and two other cytokine receptors  
322 *il10Ra* and *il13Ra*; four chemokines (*ccl34*, *cxcl11.6*, *cxc18b* and *cxc20*); ten additional *fintrim*

323 and 3 other members of the *gig2* family; and two *irf* transcription factors (2 and 10). It also  
324 includes the metalloredutase *steap3*, whose mammalian orthologue is not an ISG, but  
325 regulates type I IFN response, CXCL10 induction and iron homeostasis in mouse  
326 macrophages (39).

327 Besides this intermediate gene set, a conservative list of 219 genes seems to be up-  
328 regulated only by the virus (FC>2 and adjusted *p* value <5%), independently of IFN $\phi$ 1 (FC<1.5  
329 or adjusted *p* value >20%) (Table S3, blue; Figure 3C). This list contains 105 genes without  
330 annotation, but also several functional modules providing interesting insights on the virus-  
331 host interactions. Functional analysis using DAVID identified 6 enriched KEGG pathways,  
332 namely Cytokine-cytokine receptor interaction, Cytosolic DNA-sensing, Toll-like receptor  
333 signaling, RIG-I-like receptor signaling, Proteasome, Herpes simplex infection.

334 Importantly, type I IFNs were induced by the infection. Consistent with our previous report  
335 with another virus (10), *ifnphi1* and *ifnphi3* were clearly dominant at this larval stage, with  
336 58 $\pm$ 3 and 47 $\pm$ 11 reads respectively, compared with 9 $\pm$ 4 reads for *ifnphi2*, and none detected  
337 for *ifnphi4*. Two pro-inflammatory cytokines *il1b* and *tnfb* were also upregulated. Among  
338 typical sensors, *tlr3*, *mb21d1* (encoding cGAS) and its downstream adaptor *tmem173*  
339 (encoding STING), and several kinases of the IFN signaling pathways (*ripk1*, *tbk1*) were  
340 present. Seven proteasome subunits are induced by the virus, suggesting activation of  
341 protein degradation and Ag presentation pathways. The complement pathway also stands  
342 out as an important module upregulated by CHIKV infection: twelve complement  
343 component genes (*c1*, *c2*, several *c3*, *c7*; *c9*; *cfB*; *cfhl-1*, -3 and -5) were induced by CHIKV,  
344 suggesting that it is an important defense triggered in a Type I IFN independent manner.  
345 Additionally, this response comprises 3 metalloaminopeptidases (*anpepb*, *erap1b* and 2); the  
346 myeloid markers *ncf1*, *mpx* and *marco*; 2 guanylate binding proteins (*gbp1* and 2) that have

347 well known orthologues in human; the transcription factors *atf3* and *irf1b*, and with a high  
348 level of expression, the enzyme *rnase13* (an orthologue of human RNASE4, not of RNASEL, an  
349 ISG with no fish counterpart). Nine *fintrim* and 3 *btr* can also be noted, underscoring the  
350 importance of these TRIM with PRY/SPRY domains in virus host interactions altogether.  
351 Thus, CHIKV induces a typical IFN-stimulated response of high magnitude, but also a broader  
352 and less overt inflammatory response.

353

#### 354 *IFN receptor dependence of the response to CHIKV*

355 To test the IFN-dependence of the response to CHIKV, we used morpholinos to knock down  
356 in zebrafish larvae *crfb1* and *crfb2* which encode specific chains of the two types of type I IFN  
357 receptors of zebrafish (10). We previously showed that such IFNR morphant larvae are  
358 hypersusceptible to CHIKV infection, dying 2 to 3 days after virus injection (28). We analyzed  
359 by deep RNAseq their transcriptional response to CHIKV at 24 hours post-inoculation, and  
360 compared it to that of control morphant larvae. Choosing as cutoff values adjusted *p* values  
361 <5% and a ratio between IFN-R morphants and controls >2, we identified 187 genes for  
362 which induction was dampened by IFNR knockdown, and 10 genes that were upregulated in  
363 morphants (Table S4). Among CHIKV-induced genes (Table S3), 181 were IFNR-dependent,  
364 representing a significant fraction (181/466; 39%) (Figure 3A). Predictably, the list of genes  
365 upregulated by CHIKV in a IFNR-dependent manner largely - but not fully - overlapped with  
366 the gene set induced by recombinant IFN $\phi$ 1 (129/181; 71%, see Figure 3A). This approach  
367 led us to classify 52 new zebrafish genes as ISGs, being induced by CHIKV in an IFNR-  
368 dependent manner, even if they were not significantly induced by recombinant IFN $\phi$ 1. As  
369 previously, we searched the human orthologues of these additional ISGs (Table S2, bottom),  
370 identifying a few more human ISGs in this list, such as cGAS, NLRC5 or IFI35.



371 Together, our results provide a near-exhaustive list of zebrafish ISGs at the larval stage,  
372 identified by two independent approaches, and a useful reference for future studies.

373

#### 374 *Ancestral ISGs*

375 Assuming that the common ancestor of genes that are IFN-inducible in both human and  
376 zebrafish was itself an ISG in their last common ancestor ~450 My ago, we can define a list of  
377 ancestral ISGs. We identified 66 orthology groups that included an ISG on both the human  
378 and the zebrafish sides (Table I, Table S5). A few more ancestral ISGs were also defined by  
379 pairs of ISGs with orthology relationships at the early vertebrate or gnathostome level –  
380 meaning that the zebrafish gene is not directly orthologous to a human ISG, but is  
381 paralogous (with an ancestral taxonomy level labelled in Ensembl as “vertebrates” or “jawed  
382 vertebrates”) to another gene itself orthologous to a human ISG. In total, our list includes 72  
383 ancestral genes (Table I, Figure 4A).

384 Based on our orthology analysis, we propose new, more explicit names for many of the  
385 zebrafish ISGs with known human orthologues (in red on Table S5). This ancestral ISG core  
386 includes most ISGs with known functions. The IFN system of 450My ago seems fairly similar  
387 to the present one, particularly in its signaling components (Figure 4). Many ancestral genes  
388 have been duplicated independently in one or both lineages (Table S5), in addition to  
389 multiple ISGs apparently gained by either group (Figure 5).

390

#### 391 *IFN-downregulated genes*

392 Two of the most strongly IFN $\phi$ 1-downregulated genes (Table S1, bottom) were orthologous  
393 to human genes downregulated by type I IFNs, according to the Interferome database: *plin1*

394 (perilipin 1) and *acox1* (palmytoil acyl-CoA oxidase 1). This suggests that downregulation of  
395 fatty acid oxidation pathway is an ancient feature of the IFN system.

396 Many IFN $\phi$ 1-downregulated genes were orthologous to a human gene in a 1-to-2 manner,  
397 with the two zebrafish paralogues having arisen during the teleost specific whole genome  
398 duplication (ohnologues). Systematically, only one of the two paralogues was  
399 downregulated.

400 Remarkably, no gene was downregulated by both IFN $\phi$ 1 injection and CHIKV infection  
401 (Figure 3b, Table S3).

402

403

## 404 **Discussion**

405

406 The zebrafish has become an important model to study host-pathogen interactions,  
407 particularly at its early life stages which are the most prone to live imaging and genetically  
408 tractable. Although its antiviral interferon genes and receptors are now well identified,  
409 knowledge of IFN-induced genes, or ISGs, was only partial. In this work, we used deep  
410 sequencing to characterize the transcriptomic response of the 3dpf zebrafish larva to  
411 recombinant IFN $\alpha$ 1, the first type I IFN identified in zebrafish and the most highly inducible  
412 one. We analyzed in parallel the response to an alphavirus inducing a strong type I IFN  
413 induction, and the impact of IFN receptor knock-down on this response. From these different  
414 datasets, we established a comprehensive list of zebrafish ISGs. This list was compared to  
415 the human ISG repertoire, and a phylogenetic analysis was performed to approach the  
416 ancestral ISG repertoire of early vertebrates.

417

### 418 *1. New insights and limitations of the work*

419 A number of studies have identified genes induced by IFN or viral infections in fish (reviewed  
420 in (7)). However, very few global descriptions after treatment with recombinant type I IFN  
421 have been reported, using micro-arrays (19). Micro-array analyses are limited by probe  
422 choice, and are typically biased towards genes with known human homologues. RNAseq, by  
423 contrast, is mainly limited by the genome annotation quality and by the analysis method,  
424 and can be reanalyzed; this approach is thus more complete. Since the early zebrafish larva  
425 constitutes a reference model for investigating innate immune response, drug screening as  
426 well as for modelling diseases, we undertook a comprehensive description of the repertoire  
427 of ISG up-regulated at this developmental stage. Importantly, we previously reported a clear

428 transcriptional response of zebrafish embryos to IFN $\phi$ 1 as early as 24 hpf (Levraud et al.  
429 2007); the responsiveness to type I IFNs is thus already well established at 3 dpf. We are  
430 aware that cells present in adult but not yet in larvae, notably those of the adaptive immune  
431 system such as lymphocytes and dendritic cells may express additional ISGs, which should be  
432 assessed in further work.

433 There are two groups of type I IFNs in teleost fish (40) with two different receptors (10). This  
434 study only addresses the ISG repertoire induced by IFN $\phi$ 1 (a group 1 IFN) and it is possible  
435 that group 2 IFNs (IFN $\phi$ 2 and IFN $\phi$ 3) induce a different ISG subset. Determining this will  
436 require more studies; however, since CHIKV induces both IFN $\phi$ 1 and IFN $\phi$ 3 while *crfb1&2*  
437 morpholinos target receptors for both type I IFN groups, IFN $\phi$ 3-only induced ISGs should  
438 therefore be found among CHIKV-induced, IFNR-dependent, but non IFN $\phi$ 1-induced genes.  
439 Such genes (listed on Table S2, bottom) constituted about 30% of genes for which induction  
440 by CHIKV was impacted in morphants – and only about 15% if one also excludes genes for  
441 which induction by IFN $\phi$ 1 is almost significant (Figure 3A and C). A previous report by López-  
442 Muñoz *et al* suggests differences in ISG induction, notably in kinetics, by different IFN $\phi$ s (20).  
443

## 444 2. Comparative and phylogenetic analysis of zebrafish ISGs

445 Our comparative and phylogenetic approach led to a tentative reconstruction of the  
446 ISG repertoire of the last common ancestor of teleosts and tetrapods (LCATT) that lived  
447 ~450My ago and probably resembled the fossil osteichthyan *Ligulalepis* (41). To do so, we  
448 looked for human (co-)orthologue(s) of all zebrafish ISGs identified in our analysis. Based on  
449 available data compilations (30, 31), we then determined which one(s) of these human  
450 orthologues were themselves induced by type I IFN. In such cases, we considered that they  
451 most likely originated from an "ancestral" ISG, present in the LCATT. It is generally believed

452 that the type I IFN system emerged during the early evolution of jawed vertebrates, since  
453 Chondrichthyans (rays, sharks and chimeras) but not Agnathans (lampreys and hagfish)  
454 possess typical type I IFN genes (4, 42). Hence, it is important to note that the IFN system  
455 had already evolved, expanded and standardized for more than 50My before our last  
456 common ancestor with zebrafish.

457 Approximately half of what we defined as ancestral ISGs are represented by 1-to-1  
458 orthologues in zebrafish and human (Table S5, top rows) – a situation of practical interest, as  
459 the likelihood of conservation of gene function is highest in this case. These are either  
460 isolated genes (e.g. *RSAD2*, *ISG15* or *cGAS*), or members of "old" families already stabilized in  
461 the LCATT (e.g., *IRF7* and *IRF9*) (26). The situation is relatively similar for a few ancestral  
462 genes such as *STAT1* or *SOCS1*, with one human orthologue and two zebrafish co-  
463 orthologues that arose during the teleost-specific whole genome duplication and were  
464 retained. In contrast, many other "young" families have clearly been subjected to further  
465 duplication during later evolution of fish or tetrapods, leading to orthology groups  
466 containing multiple ISG both in zebrafish and human, the most spectacular examples being  
467 the *ISG12*, *IFIT* and *IFI44* families.

468 The frequency of orthology with a human gene is lower for ISGs (59%) than for the entire  
469 genome (71%). This is probably a consequence of the stronger evolutionary pressure of  
470 genes involved in the arms race with pathogens, as postulated by the Red Queen hypothesis  
471 (43). Similar mechanisms also explain the frequent and extensive gene duplications, as well  
472 as gene losses if some virus disappears, removing the corresponding selective pressure on a  
473 given ISG. Possibly, a greater diversity of aquatic viruses could further favor ISG retention  
474 and divergence after duplication, but few direct evidences are available.

475 In addition to the ancestral genes with true zebrafish and human orthologues, we added to  
476 this list a few genes with a more complex history, with a human and zebrafish ISGs that  
477 shared an ancestor at the basal vertebrate level (Table 1 and Table S5, bottom). These  
478 ancestral genes must have been duplicated in the LCATT genome; the teleost and tetrapod  
479 lineages then retained distinct paralogues. This comprises some genes whose evolutionary  
480 history is extremely difficult to trace due to multiple copies and extensive polymorphism,  
481 such as MHC class I genes. Here, only *mhc1zba* was found to be a zebrafish ISG, but this does  
482 not necessarily imply that other zebrafish MHC class I genes are not ISGs, as they may have  
483 been missed due to mapping issues; the strain we used (AB) is not the same as the one of  
484 the reference genome (Tü), and strain-specific divergences are considerable between strains  
485 for MHC class I, with deep evolutionary roots (44). Importantly, we did not define ancestral  
486 ISGs for zebrafish-human ISG pairs that appeared to be related at first glance, but, upon  
487 further analysis, were too distant; for example, zebrafish *vamp5* and human *VAMP8* are  
488 both ISGs, but share their last common ancestor at the Opisthokonta level, before the split  
489 of fungi and animals, very long before the emergence of IFNs.

490 Nevertheless, the type I IFN system also includes very old genes that were already present in  
491 basal metazoans. The RNaseL/OAS module is a good example of such cases, being found  
492 across metazoans from mammals to sponges (45) - but lost in the fish branch. Another  
493 striking example is the cGAS-STING module recently identified in cnidaria (46). The  
494 implication of these genes in the antiviral immunity of basal branches of animals is unknown  
495 but certainly worth investigating. The main models for invertebrate immunity are flies and  
496 mosquitoes but they largely rely on RNAi mechanisms to contain viruses (3). Central  
497 signaling modules of the vertebrate IFN system such as TLR/NFκB and JAK/STAT, are also

498 present in insects and in more distant metazoans, but they induce different set of genes with  
499 other functions (47).

500 Additionally, a few important genes do not meet our criteria for "ancestral" ISG because  
501 they are not typically inducible either in zebrafish or in human (Figure 5). For example, *irf3* is  
502 an ISG in fish but not in human, while it is the reverse for *JAK2*. Hence, our list of ancestral  
503 ISG is likely not complete, but it provides a core repertoire pointing to most fundamental  
504 factors of the vertebrate innate antiviral arsenal.

505 A relatively large number of ISGs have no orthologue in the other lineage, such as human  
506 APOBEC3, RNASEL, OAS, AIM2 (Figure 5). Similarly, many fish-specific ISG likely have been  
507 co-opted by the IFN pathway during fish evolution. In this case, they do not have clear  
508 orthologues in human and other tetrapods (as for finTRIMs and nlr-B30.2), or their  
509 orthologue(s) have no link with the type I IFN system. The finTRIM family contains the  
510 largest number of zebrafish ISGs of any family, ancestral or not. Interestingly, ISGs are found  
511 only among the recently diversified, species-specific finTRIMs; the most basal members  
512 (*ptr82-84*), well-conserved among fish, were not found here to be induced by IFN $\phi$ 1 or by  
513 CHIKV, consistent with previous studies (48). Nevertheless, *ptr83* appears to mediate  
514 protection especially in the gill region by stimulating local *ifnphi1* expression (49). The  
515 diversity and evolution under positive selection of the IFN-inducible finTRIMs evoke viral  
516 recognition (22), yet their functions remain unclear.

517 The co-optation of new genes in the ISG repertoire may be operated quickly and in a group-  
518 specific manner, by introduction of sequence motifs in the regulatory sequences, for  
519 example via retroviral insertion (50, 51). However, we cannot exclude that these branch-  
520 specific ISGs are in fact ancestral, but lost in one of the two lineages; this is the case for *Gig2*  
521 genes, which are present in the Coelacanth genome as well as in fish, and thus were lost in

522 tetrapods. Thus, our repertoire of ancestral ISGs is underestimated because we cannot  
523 include the lineage-specific losses.

524 Do ancestral ISGs identified here define a minimal but complete set of response elements  
525 from recognition to elimination of invading viruses? Probably not, as this ancestral core  
526 group of ISGs was backed up by more ISGs in any species, including the LCATT. For example,  
527 the absence of the well-known OAS/RNaseL module genes in fish (and therefore in our list of  
528 conserved ancestral ISGs) is puzzling, and one could predict that other fish genes have taken  
529 over similar functions. Similarly, APOBEC3 genes are absent in fish, and maybe their RNA-  
530 editing mechanisms are mediated by other genes, possibly by ADAR1.

531 Ancestral ISGs encode very diverse proteins in localization and function (Figure 4). We  
532 provide an extended discussion of their classification below.

533

#### 534 *4. Characterization of the IFN independent response to CHIKV infection*

535 Knowing the repertoire of ISG also offers the possibility to identify genes that are induced by  
536 viral infection independently of the type I IFN pathway. While a subset of ISGs can be  
537 induced via IFN-dependent and -independent pathways in human and fish - for example  
538 *rsad2* (12). Thus, IRF3 dependent, type I IFN independent induction of many ISG by particular  
539 viruses has been described (52).

540 However, about half of the genes upregulated by CHIKV were not induced by IFN $\beta$ 1  
541 injection, and most were not affected by IFNR knockdown. Notably, three gene sets stand  
542 out in this list: (1) components of the complement cascade, that are known to play a role in  
543 antiviral defense; (2) cytokines including some CC and CXC chemokines as well as the type I  
544 IFN themselves, which do not appear to be strongly auto/cross inducible and (3) many *btr*  
545 and *ftr* TRIM E3 ligases as well as multiple proteasome components. Interestingly too, *irf1b*,



546 the zebrafish orthologue of IRF1 (a human ISG), is CHIKV-inducible, but not in a IFN $\alpha$ -  
547 dependent manner – consistent with previous work (26) - and was not induced by IFN $\alpha$ 1.  
548 Many other genes of unknown function also share the same induction pattern, and would  
549 certainly be worth investigating. A strong redundancy of antiviral pathways has certainly  
550 been selected during evolution, since viruses have developed multiple strategies of immune  
551 subversion.

552 Contrary to what was observed with upregulated genes, there was no overlap between gene  
553 sets downregulated by IFN $\alpha$ 1 and by CHIKV. This remarkable difference could be due to the  
554 alternative inflammatory response induced by the virus besides type I IFNs, or to kinetic  
555 differences.

556

#### 557 *5. Classification of ancestral ISGs*

558 The ancestral ISG presented in Table I can be classified based on molecular functions:  
559 sensors, transcription factors and other signal transduction factors, secreted factors,  
560 enzymes including ubiquitination factors, and membrane receptors, which we discuss below.  
561 The antiviral mechanisms described in human or in other mammalian systems also provide  
562 hints about the likely conserved mode of action of these factors.

#### 563 *Transcription factors.*

564 Many members of the list appear to have DNA binding capacity and may be classified as  
565 transcription factors.

566 \* Three IRF (3, 7, 9) and two STAT(1, 2) constitute fundamental components of the type I  
567 pathway signaling, and were already present in the LCA of fish and mammals.

568 \* BATF2 is a member of the AP-1/ATF family transcription factors that controls the  
569 differentiation of immune cells and play key regulatory roles in immune responses. BATF2  
570 promotes TLR7-induced Th1 responses (53).

571 \* SP100 is a tumor suppressor and a major constituent of the PML bodies controlling  
572 transcription and/or chromatin conformation.

573 \* HELZ2 is a helicase that acts as a transcriptional coactivator for a number of nuclear  
574 receptors, including AHR, a nuclear receptor regulating lipid metabolism and the  
575 susceptibility to dengue virus (54).

576 \* transcription coactivators. PARPs can act as transcriptional co-activators and potentiate  
577 induction of many ISG (55). The multiple *ifi44* zebrafish genes counts 7 ISG among 19  
578 members, but their two human co-orthologues are induced by type I IFN. Located in the  
579 nucleus, IFI44 binds and blocks the HIV1 LTR promoter (56). However, the numerous  
580 zebrafish *ifi44* probably have sub-functionalized, and mediate multiple antiviral mechanisms.

581

582 *Sensors and related genes.*

583 The helicases RIG-I, LPGP2 and IFIH1 (aka MDA5) stand as primary ISGs encoding viral  
584 sensors. Besides, as a cytoplasmic helicase HELZ2 might also play a sensor role. In keeping  
585 with this, TREX proteins have a 3'-to-5' DNA exonuclease activity that is important to block  
586 the sting-dependent initiation of IFN responses by DNA fragments from endogenous  
587 retroviruses and elements (57).

588

589 *Enzymes.*

590 Besides transcription factors, enzymes are the most important category of ancestral ISG.

591 They may play a role in signaling or have a direct antiviral activity.

592 \* Poly-ADP-ribose polymerase (PARP) are involved in many cellular processes, from  
593 regulation of chromatin conformation to transcription control, and several PARP also are  
594 induced by infection and inflammation. PARP are represented by *parp9*, *parp12* and *parp14*  
595 among ancestral ISG. Strikingly, these three PARP are part of a nuclear complex, with the E3  
596 ubiquitin ligase encoded by *dtx3l* that is also an ancestral ISG that promoting RNA Pol II  
597 recruitment at IRF3-dependent promoters (55). Our data showing that key components of  
598 this complex are part of the essential type I IFN system underscore its importance in the core  
599 antiviral response. Besides, other activities of PARP may be involved in antiviral mechanisms;  
600 for example PARP12 mediates ADP-ribosylation of Zika virus NS1 and NS3, leading to their  
601 degradation by the proteasome (58). The ADP-ribo-hydrolase encoded by the Chikungunya  
602 virus, that is required for its virulence, is another hint of the central importance of these  
603 enzymes in antiviral defense (59).

604 \* Several E3 Ubiquitin ligases were found among ancestral ISG, including *trim25*, *usp18*,  
605 *rnf114*, *dtx3l*. The mechanisms through which they exert antiviral activity or regulate the  
606 response are not fully resolved. The critical role of *trim25* in RIGI activation, and its capacity  
607 of ISGylation (60) have been well documented in fish and mammals. *isg15*, an ubiquitin like  
608 protein, is also an ancestral ISG playing a central role in the type I IFN pathway in fish and  
609 mammals (7, 60) via multiple mechanisms.

610 \* The pro-apoptotic caspase *casp7* possess type I IFN induced orthologues in zebrafish and  
611 human. Interestingly, ancestral ISG also comprise *pmaip1* that promotes caspase activation  
612 and apoptosis via modifications of the mitochondrial membrane, and *xiaf1*, a negative  
613 regulator of members of inhibitor of apoptosis proteins. Taken together, these observations  
614 indicate that the ancestral type I IFN system comprised a pro-apoptotic module.

615 \* The pro-inflammatory caspase *casp1*, is also an ancestral ISG, as is *pycard* which encodes

616 ASC, the major scaffold protein of the canonical inflammasome. Induction of the  
617 inflammasome is thus an ancestral property of the IFN response. Many upstream sensors of  
618 the inflammasome are IFN-inducible, but they are generally divergent in the two lineages,  
619 *nlr5* being the only ancestral ISG.

620 \* *Rsad2* (aka *viperin*) is an enzyme with a direct antiviral function, that catalyzes the  
621 conversion of CTP to a completely new ribonucleoside, the 3'-deoxy-3',4'-didehydro-CTP  
622 (ddhCTP) acting as a terminator of RNA synthesis (61). Interestingly, both ancestral ISG *rsad2*  
623 and the nucleotide modifier *cpmk2* are located very close to each other in the genome in  
624 fish as well as in mammals; likely forming a conserved functional antiviral unit.

625 \* Adenosine deaminases acting on double-stranded RNA (ADARs) deaminate adenosine to  
626 produce inosine in double-stranded RNA structures, regulating the inflammation induced by  
627 such molecules (62). Accordingly, loss of function of *adar* in zebrafish larvae leads to brain  
628 inflammation in a model of Aicardi-Goutières syndrome, suggesting a key regulatory role of  
629 this gene during type I IFN response (63).

630 \* Protein Kinase R (PKR, encoded by *EIF2AK2*) is activated by dsRNA (and thus could have  
631 been listed above as a sensor), leading phosphorylation of EIF2 $\alpha$ , and to inhibition of protein  
632 synthesis and viral replication. Many viruses encode PKR inhibitors of this cornerstone  
633 antiviral factor that also affects transcription factors like IRF1, STATs, and NF-kappaB and  
634 upregulates many genes including  *$\beta$ 2microglobulin* and *isg15* (64). Interestingly, the other  
635 ancestral ISG *epsti1* can activate PKR promoters and induce PKR-dependent genes in human  
636 (65), questioning whether *pkR* and *epsti1* may have been functionally coupled from the  
637 LCATT. Fish possess a lineage specific paralogue of PKR called PKZ, which detects Z-DNA (66).

638

639 *Secreted factors.*

640 \* In humans and mice, *ccl19* is implicated in lymphocyte migration and is important to  
641 define compartments within lymphoid tissues. In rainbow trout, one of the six *ccl19*  
642 paralogues present in the genome participate to antiviral immunity through promotion of  
643 mucosal and central CD8+ T cell response (67).

644 \* Some of the fish homologues of murine and human IFN inducible CXC chemokines – ie,  
645 CXCL9-11, which bind CXCR3, a receptor expressed by various leukocyte, including some T  
646 cells, macrophages, and dendritic cell subsets – are also up-regulated by IFN $\phi$  in zebrafish  
647 larvae. These genes have been largely expanded in fish, and two lineages of CXCL11 have  
648 been recently distinguished, both closely related to the mammalian CXCL9-11 (68, 69). The  
649 up-regulated *cxcl11.3* (aka *cxc66* or *cxcl11ac*) identified in this work belongs to the lineage  
650 1. The zebrafish has three *cxcr3* paralogues, and receptor-ligand binding, tested for three  
651 other zebrafish *cxcl11* ligands, does not follow ligand lineage (70), so the receptor(s) of this  
652 ISG remains to be identified experimentally.

653 \* Another soluble factor up-regulated by type I IFN and viral infection in fish is galectin9 (this  
654 work, and (13)). In mammals, Galectin9 is involved in multiple mechanisms of antiviral  
655 immunity. For example, it is a potent factor against HCMV because it blocks the entry of the  
656 virus in target cells (71). Galectin9 can also regulates HIV transcription, and induces the  
657 expression of the deaminase APOBEC3G, a potent antiviral factor (72). Besides, the galectin-  
658 9 receptor TIM3 is implicated in the control of Th1 cells (73).

659

#### 660 *Membrane proteins*

661 \* While zebrafish and human *mhc class I* are not direct orthologues, *mhc class I* genes are in  
662 the list, with  *$\beta$ 2microglobulin* and the peptide transporters *tap-1* and *tap-2*, as well as  
663 homologues of TAPBP and proteasome subunits, indicating that this pathway is a

664 fundamental component of the type I IFN system.

665 \* Other important membrane proteins in the list are tetraspanins of the CD9 family, that  
666 regulate degranulation of myeloid subsets and secretion of cytokines, hence constitute key  
667 players in inflammation (74).

668 \* Zebrafish possess eight *isg12* genes located in tandem, of which six were highly inducible  
669 by IFN $\phi$ 1 and by CHIKV. Their human ISG orthologues IFI6 and IFI27 (aka ISG12A) are internal  
670 membrane proteins stabilizing ER membrane and preventing the formation of flavivirus-  
671 induced ER membrane invaginations (75) or destabilize mitochondrial membrane and  
672 promote apoptosis (76). In fact, IFI27 can also recruit a E3 ubiquitin ligase and targets HCV  
673 NS5 protein to degradation (77), illustrating the potential diversity of antiviral mechanisms  
674 mediated by members of this family.

675 \*APOL1 affects endocytosis and promotes an expansion of the lysosomal compartment,  
676 favoring for example the degradation of the HIV-1 protein Vif (78).

677

678 *ISG with unknown functions or unknown antiviral mechanisms*

679 Even in human and mice, the basis of antiviral activity of certain ISGs remains completely  
680 unknown. For example, the effects of PHF11, RNF114, or SAMD9 are elusive. In the latter, a  
681 DNA/RNA-binding Alba, a NTPase, and a OB domain with predicted RNA-binding properties  
682 suggest a link with nucleic acid metabolism or sensing (79). These very old ISG with  
683 counterparts found across Metazoa and even in procaryotes, are key restriction factors of  
684 poxviruses (80).

685

686 *6. Conclusions*

687 Antiviral genes are well known to evolve very fast, as postulated by the Red Queen  
688 hypothesis, under strong pressure from pathogens. This is indeed illustrated by the large  
689 number of ISGs that are either fish- or mammal-specific. Nevertheless, our data define a  
690 surprisingly stable set of core ISGs, that were apparently co-opted into the new IFN system  
691 of early vertebrates about 500My ago, and have been maintained for the last 450My both in  
692 fish and tetrapods. The full list of zebrafish ISG provides a powerful reference to characterize  
693 the subtle interactions between viruses and the host response, including redundancy of  
694 immune pathways and viral subversion mechanisms. It also constitutes a valuable resource  
695 for the study of autoinflammatory disease using the emerging zebrafish model.

696

697

698

## 699 **Acknowledgements**

700 We thank Jean-Yves Coppee and Caroline Proux from the transcriptomics platform of Institut  
701 Pasteur, for generation and sequencing of RNA libraries. We are indebted to Rune Hartmann  
702 (Aarhus, Denmark) for recombinant zebrafish interferon and stimulating discussion. We  
703 thank Emma Colucci and Pedro Hernandez-Cerda for critical reading of the manuscript.

704

705

706

707



## 708   **References**

709

- 710   1. Schoggins, J. W., and C. M. Rice. 2011. Interferon-stimulated genes and their antiviral  
711   effector functions. *Curr. Opin. Virol.* 1: 519–525.
- 712   2. Backes, S., R. A. Langlois, S. Schmid, A. Varble, J. V. Shim, D. Sachs, and B. R. TenOever.  
713   2014. The Mammalian Response to Virus Infection Is Independent of Small RNA Silencing.  
714   *Cell Rep.* 8: 114–125.
- 715   3. Guo, Z., Y. Li, and S. W. Ding. 2019. Small RNA-based antimicrobial immunity. *Nat. Rev.*  
716   *Immunol.* 19: 31–44.
- 717   4. Secombes, C. J., and J. Zou. 2017. Evolution of interferons and interferon receptors. *Front.*  
718   *Immunol.* 8: 209.
- 719   5. Redmond, A. K., J. Zou, C. J. Secombes, D. J. Macqueen, and H. Dooley. 2019. Discovery of  
720   All Three Types in Cartilaginous Fishes Enables Phylogenetic Resolution of the Origins and  
721   Evolution of Interferons. *Front. Immunol.* 10: 1558.
- 722   6. Zou, J., and C. J. Secombes. 2011. Teleost fish interferons and their role in immunity. *Dev.*  
723   *Comp. Immunol.* 35: 1376–1387.
- 724   7. Langevin, C., E. Aleksejeva, G. Passoni, N. Palha, J. P. Levrud, and P. Boudinot. 2013. The  
725   antiviral innate immune response in fish: Evolution and conservation of the IFN system. *J.*  
726   *Mol. Biol.* 425: 4904–4920.
- 727   8. Boudinot, P., C. Langevin, C. J. Secombes, and J.-P. Levrud. 2016. The peculiar  
728   characteristics of fish type I interferons. *Viruses* 8.
- 729   9. Robertsen, B. 2018. The role of type I interferons in innate and adaptive immunity against  
730   viruses in Atlantic salmon. *Dev. Comp. Immunol.* 80: 41–52.
- 731   10. Aggad, D., M. Mazel, P. Boudinot, K. E. Mogensen, O. J. Hamming, R. Hartmann, S.

- 732 Kotenko, P. Herbomel, G. Lutfalla, and J.-P. Levraud. 2009. The two groups of zebrafish virus-  
733 induced interferons signal via distinct receptors with specific and shared chains. *J. Immunol.*  
734 183: 3924–3931.
- 735 11. Staeheli, P., Y. X. Yu, R. Grob, and O. Haller. 1989. A double-stranded RNA-inducible fish  
736 gene homologous to the murine influenza virus resistance gene Mx. *Mol. Cell. Biol.* 9: 3117–  
737 21.
- 738 12. Boudinot, P., P. Massin, M. Blanco, S. Riffault, and A. Benmansour. 1999. vig-1, a new fish  
739 gene induced by the rhabdovirus glycoprotein, has a virus-induced homologue in humans  
740 and shares conserved motifs with the MoxA family. *J. Virol.* 73: 1846–1852.
- 741 13. O’Farrell, C., N. Vaghefi, and M. Cantonnet. 2002. Survey of Transcript Expression in  
742 Rainbow Trout Leukocytes Reveals a Major Contribution of Interferon-Responsive Genes in  
743 the Early Response to a Rhabdovirus Infection. *J. Virol.* 76: 8040–8049.
- 744 14. Levraud, J.-P., P. Boudinot, I. Colin, A. Benmansour, N. Peyrieras, P. Herbomel, and G.  
745 Lutfalla. 2007. Identification of the zebrafish IFN receptor: implications for the origin of the  
746 vertebrate IFN system. *J. Immunol.* 178: 4385–4394.
- 747 15. Lutfalla, G., H. R. Crollius, N. Stange-Thomann, O. Jaillon, K. Mogensen, and D.  
748 Monneron. 2003. Comparative genomic analysis reveals independent expansion of a lineage-  
749 specific gene family in vertebrates: The class II cytokine receptors and their ligands in  
750 mammals and fish. *BMC Genomics* 4: 29.
- 751 16. Altmann, S. M., M. T. Mellon, D. L. Distel, and C. H. Kim. 2003. Molecular and Functional  
752 Analysis of an Interferon Gene from the Zebrafish, *Danio rerio*. *J. Virol.* 77: 1992–2002.
- 753 17. Robertsen, B., V. Bergan, T. Røkenes, R. Larsen, and A. Albuquerque. 2003. Atlantic  
754 Salmon Interferon Genes: Cloning, Sequence Analysis, Expression, and Biological Activity. *J.*  
755 *Interf. Cytokine Res.* 23: 601–612.

- 756 18. Purcell, M. K., K. M. Nichols, J. R. Winton, G. Kurath, G. H. Thorgaard, P. Wheeler, J. D.  
757 Hansen, R. P. Herwig, and L. K. Park. 2006. Comprehensive gene expression profiling  
758 following DNA vaccination of rainbow trout against infectious hematopoietic necrosis virus.  
759 *Mol. Immunol.* 43: 2089–2106.
- 760 19. Martin, S. A. M., J. B. Taggart, P. Seear, J. E. Bron, R. Talbot, A. J. Teale, G. E. Sweeney, B.  
761 Høyheim, D. F. Houlihan, D. R. Tocher, J. Zou, and C. J. Secombes. 2007. Interferon type I and  
762 type II responses in an Atlantic salmon ( *Salmo salar* ) SHK-1 cell line by the salmon  
763 TRAITS/SGP microarray. *Physiol. Genomics* 32: 33–44.
- 764 20. López-Muñoz, A., F. J. Roca, J. Meseguer, and V. Mulero. 2009. New insights into the  
765 evolution of IFNs: zebrafish group II IFNs induce a rapid and transient expression of IFN-  
766 dependent genes and display powerful antiviral activities. *J. Immunol.* 182: 3440–3449.
- 767 21. Rothenburg, S., N. Deigendesch, M. Dey, T. E. Dever, and L. Tazi. 2008. Double-stranded  
768 RNA-activated protein kinase PKR of fishes and amphibians: varying the number of double-  
769 stranded RNA binding domains and lineage-specific duplications. *BMC Biol.* 6: 12.
- 770 22. van der Aa, L. M., J.-P. Levraud, M. Yahmi, E. Lauret, V. Briolat, P. Herbomel, A.  
771 Benmansour, and P. Boudinot. 2009. A large new subset of TRIM genes highly diversified by  
772 duplication and positive selection in teleost fish. *BMC Biol.* 7: 7.
- 773 23. Zhang, Y. B., and J. F. Gui. 2004. Identification and expression analysis of two IFN-  
774 inducible genes in crucian carp (*Carassius auratus* L.). *Gene* 60: 1–9.
- 775 24. Zhang, Y. B., T. K. Liu, J. Jiang, J. Shi, Y. Liu, S. Li, and J. F. Gui. 2013. Identification of a  
776 Novel Gig2 Gene Family Specific to Non-Amniote Vertebrates. *PLoS One* 8: e60588.
- 777 25. Boudinot, P., S. Salhi, M. Blanco, and A. Benmansour. 2001. Viral haemorrhagic  
778 septicaemia virus induces vig -2, a new interferon-responsive gene in rainbow trout. *Fish*  
779 *Shellfish Immunol.* 11: 383–397.

- 780 26. Briolat, V., L. Jouneau, R. Carvalho, N. Palha, C. Langevin, P. Herbomel, O. Schwartz, H. P.  
781 Spaink, J.-P. Levraud, and P. Boudinot. 2014. Contrasted Innate Responses to Two Viruses in  
782 Zebrafish: Insights into the Ancestral Repertoire of Vertebrate IFN-Stimulated Genes. *J.*  
783 *Immunol.* 192: 4328–41.
- 784 27. Ludwig, M., N. Palha, C. Torhy, V. Briolat, E. Colucci-Guyon, M. Brémont, P. Herbomel, P.  
785 Boudinot, and J. P. Levraud. 2011. Whole-body analysis of a viral infection: Vascular  
786 endothelium is a primary target of Infectious Hematopoietic Necrosis Virus in zebrafish  
787 larvae. *PLoS Pathog.* 7: e1001269.
- 788 28. Palha, N., F. Guivel-Benhassine, V. Briolat, G. Lutfalla, M. Sourisseau, F. Ellett, C. H. Wang,  
789 G. J. Lieschke, P. Herbomel, O. Schwartz, and J. P. Levraud. 2013. Real-Time Whole-Body  
790 Visualization of Chikungunya Virus Infection and Host Interferon Response in Zebrafish. *PLoS*  
791 *Pathog.* 9: e1003619.
- 792 29. Howe, K., M. D. Clark, C. F. Torroja, J. Torrance, C. Berthelot, M. Muffato, J. E. Collins, S.  
793 Humphray, K. McLaren, L. Matthews, S. McLaren, I. Sealy, M. Caccamo, C. Churcher, C. Scott,  
794 J. C. Barrett, R. Koch, G.-J. Rauch, S. White, W. Chow, B. Kilian, L. T. Quintais, J. a Guerra-  
795 Assunção, Y. Zhou, Y. Gu, J. Yen, J.-H. Vogel, T. Eyre, S. Redmond, R. Banerjee, J. Chi, B. Fu, E.  
796 Langley, S. F. Maguire, G. K. Laird, D. Lloyd, E. Kenyon, S. Donaldson, H. Sehra, J. Almeida-  
797 King, J. Loveland, S. Trevanion, M. Jones, M. Quail, D. Willey, A. Hunt, J. Burton, S. Sims, K.  
798 McLay, B. Plumb, J. Davis, C. Clee, K. Oliver, R. Clark, C. Riddle, D. Elliot, D. Elliott, G.  
799 Threadgold, G. Harden, D. Ware, S. Begum, B. Mortimore, B. Mortimer, G. Kerry, P. Heath, B.  
800 Phillimore, A. Tracey, N. Corby, M. Dunn, C. Johnson, J. Wood, S. Clark, S. Pelan, G. Griffiths,  
801 M. Smith, R. Glithero, P. Howden, N. Barker, C. Lloyd, C. Stevens, J. Harley, K. Holt, G.  
802 Panagiotidis, J. Lovell, H. Beasley, C. Henderson, D. Gordon, K. Auger, D. Wright, J. Collins, C.  
803 Raisen, L. Dyer, K. Leung, L. Robertson, K. Ambridge, D. Leongamornlert, S. McGuire, R.

804 Gilderthorp, C. Griffiths, D. Manthravadi, S. Nichol, G. Barker, S. Whitehead, M. Kay, J.  
805 Brown, C. Murnane, E. Gray, M. Humphries, N. Sycamore, D. Barker, D. Saunders, J. Wallis, A.  
806 Babbage, S. Hammond, M. Mashreghi-Mohammadi, L. Barr, S. Martin, P. Wray, A. Ellington,  
807 N. Matthews, M. Ellwood, R. Woodmansey, G. Clark, J. D. Cooper, J. Cooper, A. Tromans, D.  
808 Grafham, C. Skuce, R. Pandian, R. Andrews, E. Harrison, A. Kimberley, J. Garnett, N. Fosker,  
809 R. Hall, P. Garner, D. Kelly, C. Bird, S. Palmer, I. Gehring, A. Berger, C. M. Dooley, Z. Ersan-  
810 Ürün, C. Eser, H. Geiger, M. Geisler, L. Karotki, A. Kirn, J. Konantz, M. Konantz, M.  
811 Oberländer, S. Rudolph-Geiger, M. Teucke, C. Lanz, G. Raddatz, K. Osoegawa, B. Zhu, A.  
812 Rapp, S. Widaa, C. Langford, F. Yang, S. C. Schuster, N. P. Carter, J. Harrow, Z. Ning, J.  
813 Herrero, S. M. J. Searle, A. Enright, R. Geisler, R. H. a Plasterk, C. Lee, M. Westerfield, P. J. de  
814 Jong, L. I. Zon, J. H. Postlethwait, C. Nüsslein-Volhard, T. J. P. Hubbard, H. Roest Crollius, J.  
815 Rogers, and D. L. Stemple. 2013. The zebrafish reference genome sequence and its  
816 relationship to the human genome. *Nature* 496: 498–503.  
817 30. Schoggins, J. W., S. J. Wilson, M. Panis, M. Y. Murphy, C. T. Jones, P. Bieniasz, and C. M.  
818 Rice. 2011. A diverse range of gene products are effectors of the type I interferon antiviral  
819 response. *Nature* 472: 481–5.  
820 31. Rusinova, I., S. Forster, S. Yu, A. Kannan, M. Masse, H. Cumming, R. Chapman, and P. J.  
821 Hertzog. 2013. INTERFEROME v2.0: An updated database of annotated interferon-regulated  
822 genes. *Nucleic Acids Res.* 41: 1040–1046.  
823 32. Levraud, J.-P., E. Colucci-Guyon, M. J. Redd, G. Lutfalla, and P. Herbomel. 2008. In vivo  
824 analysis of zebrafish innate immunity. *Methods Mol. Biol.* 415: 337–363.  
825 33. Biacchesi, S., M. LeBerre, A. Lamoureux, Y. Louise, E. Lauret, P. Boudinot, and M.  
826 Brémont. 2009. Mitochondrial antiviral signaling protein plays a major role in induction of  
827 the fish innate immune response against RNA and DNA viruses. *J. Virol.* 83: 7815–27.

- 828 34. Letunic, I., and P. Bork. 2018. 20 years of the SMART protein domain annotation  
829 resource. *Nucleic Acids Res.* 46: D493-496.
- 830 35. Boudinot, P., L. M. van der Aa, L. Jouneau, L. Pasquier, P. Pontarotti, V. Briolat, A.  
831 Benmansour, and J. P. Levraud. 2011. Origin and evolution of TRIM proteins: New insights  
832 from the complete TRIM repertoire of zebrafish and pufferfish. *PLoS One* 6: e22022.
- 833 36. Howe, K., P. H. Schiffer, J. Zielinski, T. Wiehe, G. K. Laird, J. C. Marioni, O. Soylemez, F.  
834 Kondrashov, and M. Leptin. 2016. Structure and evolutionary history of a large family of NLR  
835 proteins in the zebrafish. *Open Biol.* 6: 160009.
- 836 37. Stein, C., M. Caccamo, G. Laird, and M. Leptin. 2007. Conservation and divergence of  
837 gene families encoding components of innate immune response systems in zebrafish.  
838 *Genome Biol.* 8: R251.
- 839 38. Laing, K. J., M. K. Purcell, J. R. Winton, and J. D. Hansen. 2008. A genomic view of the  
840 NOD-like receptor family in teleost fish: Identification of a novel NLR subfamily in zebrafish.  
841 *BMC Evol. Biol.* 8: 42.
- 842 39. Zhang, F., Y. Tao, Z. Zhang, X. Guo, P. An, Y. Shen, Q. Wu, Y. Yu, and F. Wang. 2012.  
843 Metalloreductase steap3 coordinates the regulation of iron homeostasis and inflammatory  
844 responses. *Haematologica* 97: 1826–1835.
- 845 40. Zou, J., C. Tafalla, J. Truckle, and C. J. Secombes. 2007. Identification of a second group of  
846 type I IFNs in fish sheds light on IFN evolution in vertebrates. *J. Immunol.* 179: 3859–3871.
- 847 41. Clement, A. M., B. King, S. Giles, B. Choo, P. E. Ahlberg, G. C. Young, and J. A. Long. 2018.  
848 Neurocranial anatomy of an enigmatic Early Devonian fish sheds light on early osteichthyan  
849 evolution. *Elife* 7: e34349.
- 850 42. Venkatesh, B., A. P. Lee, V. Ravi, A. K. Maurya, M. M. Lian, J. B. Swann, Y. Ohta, M. F.  
851 Flajnik, Y. Sutoh, M. Kasahara, S. Hoon, V. Gangu, S. W. Roy, M. Irimia, V. Korzh, I.

- 852 Kondrychyn, Z. W. Lim, B. H. Tay, S. Tohari, K. W. Kong, S. Ho, B. Lorente-Galdos, J. Quilez, T.  
853 Marques-Bonet, B. J. Raney, P. W. Ingham, A. Tay, L. W. Hillier, P. Minx, T. Boehm, R. K.  
854 Wilson, S. Brenner, and W. C. Warren. 2014. Elephant shark genome provides unique  
855 insights into gnathostome evolution. *Nature* 505: 174–179.
- 856 43. tenOever, B. R. 2016. The Evolution of Antiviral Defense Systems. *Cell Host Microbe* 19:  
857 142–149.
- 858 44. McConnell, S. C., K. M. Hernandez, D. J. Wcisel, R. N. Kettleborough, D. L. Stemple, J. A.  
859 Yoder, J. Andrade, and J. L. O. de Jong. 2016. Alternative haplotypes of antigen processing  
860 genes in zebrafish diverged early in vertebrate evolution. *Proc. Natl. Acad. Sci.* 113: E5014–  
861 E5023.
- 862 45. Pärri, M., A. Kuusksalu, A. Lopp, T. Reintamm, J. Justesen, and M. Kelve. 2007. Expression  
863 and characterization of recombinant 2 $\alpha$ ,5 $\alpha$ - oligoadenylate synthetase from the marine  
864 sponge *Geodia cydonium*. *FEBS J.* 274: 3462–3474.
- 865 46. Kranzusch, P. J., S. C. Wilson, A. S. Y. Lee, J. M. Berger, J. A. Doudna, and R. E. Vance.  
866 2015. Ancient Origin of cGAS-STING Reveals Mechanism of Universal 2',3' cGAMP Signaling.  
867 *Mol. Cell* 59: 891–903.
- 868 47. Liongue, C., R. Sertori, and A. C. Ward. 2016. Evolution of Cytokine Receptor Signaling. *J.*  
869 *Immunol.* 197: 11–18.
- 870 48. Langevin, C., J. P. Levraud, and P. Boudinot. 2019. Fish antiviral tripartite motif (TRIM)  
871 proteins. *Fish Shellfish Immunol.* 86: 724–733.
- 872 49. Langevin, C., E. Aleksejeva, A. Houel, V. Briolat, C. Torhy, A. Lunazzi, J.-P. Levraud, and P.  
873 Boudinot. 2017. FTR83, a member of the large fish-specific finTRIM family, triggers IFN  
874 pathway and counters viral infection. *Front. Immunol.* 8: 617.
- 875 50. Chuong, E. B., N. C. Elde, and C. Feschotte. 2016. Regulatory evolution of innate

- 876 immunity through co-option of endogenous retroviruses. *Science* (80- ). 351: 1083–7.
- 877 51. Arnold, M. L., and K. Kunte. 2017. Adaptive Genetic Exchange: A Tangled History of  
878 Admixture and Evolutionary Innovation. *Trends Ecol. Evol.* 32: 601–611.
- 879 52. Ashley, C. L., A. Abendroth, B. P. McSharry, and B. Slobedman. 2019. Interferon-  
880 Independent Upregulation of Interferon-Stimulated Genes during Human Cytomegalovirus  
881 Infection is Dependent on IRF3 Expression. *Viruses* 11: E246.
- 882 53. Kanemaru, H., F. Yamane, K. Fukushima, T. Matsuki, T. Kawasaki, I. Ebina, K. Kuniyoshi, H.  
883 Tanaka, K. Maruyama, K. Maeda, T. Satoh, and S. Akira. 2017. Antitumor effect of Batf2  
884 through IL-12 p40 up-regulation in tumor-associated macrophages. *Proc. Natl. Acad. Sci.*  
885 114: E7331–E7340.
- 886 54. Fusco, D. N., H. Pratt, S. Kandilas, S. S. Y. Cheon, W. Lin, D. A. Cronkite, M. Basavappa, K.  
887 L. Jeffrey, A. Anselmo, R. Sadreyev, C. Yapp, X. Shi, J. F. O’Sullivan, R. E. Gerszten, T. Tomaru,  
888 S. Yoshino, T. Satoh, and R. T. Chung. 2017. HELZ2 is an IFN effector mediating suppression  
889 of dengue virus. *Front. Microbiol.* 8: 240.
- 890 55. Caprara, G., E. Prosperini, V. Piccolo, G. Sigismondo, A. Melacarne, A. Cuomo, M.  
891 Boothby, M. Rescigno, T. Bonaldi, and G. Natoli. 2018. PARP14 Controls the Nuclear  
892 Accumulation of a Subset of Type I IFN-Inducible Proteins. *J. Immunol.* 200: 2439–2454.
- 893 56. Power, D., N. Santoso, M. Dieringer, J. Yu, H. Huang, S. Simpson, I. Seth, H. Miao, and J.  
894 Zhu. 2015. IFI44 suppresses HIV-1 LTR promoter activity and facilitates its latency. *Virology*  
895 481: 142–50.
- 896 57. Yan, N. 2017. Immune Diseases Associated with TREX1 and STING Dysfunction. *J. Interf.*  
897 *Cytokine Res.* 37: 198–206.
- 898 58. Li, L., H. Zhao, P. Liu, C. Li, N. Quanquin, X. Ji, N. Sun, P. Du, C. F. Qin, N. Lu, and G. Cheng.  
899 2018. PARP12 suppresses Zika virus infection through PARP-dependent degradation of NS1



- 900 and NS3 viral proteins. *Sci. Signal.* 11: eaas9332.
- 901 59. McPherson, R. L., R. Abraham, E. Sreekumar, S.-E. Ong, S.-J. Cheng, V. K. Baxter, H. A. V.
- 902 Kistemaker, D. V. Filippov, D. E. Griffin, and A. K. L. Leung. 2017. ADP-ribosylhydrolase
- 903 activity of Chikungunya virus macrodomain is critical for virus replication and virulence. *Proc.*
- 904 *Natl. Acad. Sci.* 114: 16666–1671.
- 905 60. Langevin, C., L. M. van der Aa, a Houel, C. Torhy, V. Briolat, a Lunazzi, a Harmache, M.
- 906 Bremont, J.-P. Levraud, and P. Boudinot. 2013. Zebrafish ISG15 exerts a strong antiviral
- 907 activity against RNA and DNA viruses and regulates the interferon response. *J. Virol.* 87:
- 908 10025–36.
- 909 61. Gizzi, A. S., T. L. Grove, J. J. Arnold, J. Jose, R. K. Jangra, S. J. Garforth, Q. Du, S. M. Cahill,
- 910 N. G. Dulyaninova, J. D. Love, K. Chandran, A. R. Bresnick, C. E. Cameron, and S. C. Almo.
- 911 2018. A naturally occurring antiviral ribonucleotide encoded by the human genome. *Nature*
- 912 558: 610–614.
- 913 62. Samuel, C. E. 2019. Adenosine deaminase acting on RNA (ADAR1), a suppressor of
- 914 double-stranded RNA-triggered innate immune responses. *J. Biol. Chem.* 294: 1710–1720.
- 915 63. Kasher, P. R., E. M. Jenkinson, V. Briolat, D. Gent, C. Morrissey, L. A. H. Zeef, G. I. Rice, J.-
- 916 P. Levraud, and Y. J. Crow. 2015. Characterization of samhd1 morphant zebrafish
- 917 recapitulates features of the human type i interferonopathy Aicardi-Goutières syndrome. *J.*
- 918 *Immunol.* 194.
- 919 64. Guerra, S., L. A. López-Fernández, M. A. García, A. Zaballos, and M. Esteban. 2006.
- 920 Human gene profiling in response to the active protein kinase, interferon-induced
- 921 serine/threonine protein kinase (PKR), in infected cells: Involvement of the transcription
- 922 factor ATF-3 in PKR-induced apoptosis. *J. Biol. Chem.* 281: 18734–18745.
- 923 65. Meng, X., D. Yang, R. Yu, and H. Zhu. 2015. EPST11 is involved in IL-28A-mediated

- 924 inhibition of HCV Infection. *Mediators Inflamm.* 2015: 716315.
- 925 66. Rothenburg, S., N. Deigendesch, K. Dittmar, F. Koch-Nolte, F. Haag, K. Lowenhaupt, and  
926 A. Rich. 2005. A PKR-like eukaryotic initiation factor 2 kinase from zebrafish contains Z-DNA  
927 binding domains instead of dsRNA binding domains. *Proc. Natl. Acad. Sci.* 102: 1602–1607.
- 928 67. Sepahi, A., L. Tacchi, E. Casadei, F. Takizawa, S. E. LaPatra, and I. Salinas. 2017. CK12a, a  
929 CCL19-like Chemokine That Orchestrates both Nasal and Systemic Antiviral Immune  
930 Responses in Rainbow Trout. *J. Immunol.* 199: 3900–3913.
- 931 68. Nomiya, H., N. Osada, and O. Yoshie. 2013. Systematic classification of vertebrate  
932 chemokines based on conserved synteny and evolutionary history. *Genes to Cells* 18: 1–16.
- 933 69. Chen, J., Q. Xu, T. Wang, B. Collet, Y. Corripio-Miyar, S. Bird, P. Xie, P. Nie, C. J. Secombes,  
934 and J. Zou. 2013. Phylogenetic analysis of vertebrate CXC chemokines reveals novel lineage  
935 specific groups in teleost fish. *Dev. Comp. Immunol.* 41: 137–152.
- 936 70. Torraca, V., C. Cui, R. Boland, J.-P. Bebelman, A. M. van der Sar, M. J. Smit, M. Siderius, H.  
937 P. Spaink, and A. H. Meijer. 2015. The CXCR3-CXCL11 signaling axis mediates macrophage  
938 recruitment and dissemination of mycobacterial infection. *Dis. Model. Mech.* 7: 253–269.
- 939 71. Machala, E. A., S. Avdic, L. Stern, D. M. Zajonc, C. A. Benedict, E. Blyth, D. J. Gottlieb, A.  
940 Abendroth, B. P. McSharry, and B. Slobedman. 2018. Restriction of Human Cytomegalovirus  
941 Infection by Galectin-9. *J. Virol.* 93: e01746-18.
- 942 72. Abdel-Mohsen, M., L. Chavez, R. Tandon, G. M. Chew, X. Deng, A. Danesh, S. Keating, M.  
943 Lanteri, M. L. Samuels, R. Hoh, J. B. Sacha, P. J. Norris, T. Niki, C. M. Shikuma, M. Hirashima,  
944 S. G. Deeks, L. C. Ndhlovu, and S. K. Pillai. 2016. Human Galectin-9 Is a Potent Mediator of  
945 HIV Transcription and Reactivation. *PLoS Pathog.* 12: e1005677.
- 946 73. Zhu, C., A. C. Anderson, A. Schubart, H. Xiong, J. Imitola, S. J. Khoury, X. X. Zheng, T. B.  
947 Strom, and V. K. Kuchroo. 2005. The Tim-3 ligand galectin-9 negatively regulates T helper

- 948 type 1 immunity. *Nat. Immunol.* 6: 1245–1252.
- 949 74. Brosseau, C., L. Colas, A. Magnan, and S. Brouard. 2018. CD9 tetraspanin: A new pathway  
950 for the regulation of inflammation? *Front. Immunol.* 9: 2316.
- 951 75. Richardson, R. B., M. B. Ohlson, J. L. Eitson, A. Kumar, M. B. McDougal, I. N. Boys, K. B.  
952 Mar, P. C. De La Cruz-Rivera, C. Douglas, G. Konopka, C. Xing, and J. W. Schoggins. 2018. A  
953 CRISPR screen identifies IFI6 as an ER-resident interferon effector that blocks flavivirus  
954 replication. *Nat. Microbiol.* 3: 1214–1223.
- 955 76. Cheriya, V., D. W. Leaman, and E. C. Borden. 2011. Emerging Roles of FAM14 Family  
956 Members (G1P3/ISG 6–16 and ISG12/IFI27) in Innate Immunity and Cancer. *J. Interf.*  
957 *Cytokine Res.* 31: 173–181.
- 958 77. Xue, B., D. Yang, J. Wang, Y. Xu, X. Wang, Y. Qin, R. Tian, S. Chen, Q. Xie, N. Liu, and H.  
959 Zhu. 2016. ISG12a Restricts Hepatitis C Virus Infection through the Ubiquitination-  
960 Dependent Degradation Pathway. *J. Virol.* 90: 6832–6845.
- 961 78. Taylor, H. E., A. K. Khatua, and W. Popik. 2014. The Innate Immune Factor Apolipoprotein  
962 L1 Restricts HIV-1 Infection. *J. Virol.* 88: 592–603.
- 963 79. Mekhedov, S. L., K. S. Makarova, and E. V. Koonin. 2017. The complex domain  
964 architecture of SAMD9 family proteins, predicted STAND-like NTPases, suggests new links to  
965 inflammation and apoptosis. *Biol. Direct* 12: 13.
- 966 80. Meng, X., F. Zhang, B. Yan, C. Si, H. Honda, A. Nagamachi, L. Z. Sun, and Y. Xiang. 2018. A  
967 paralogous pair of mammalian host restriction factors form a critical host barrier against  
968 poxvirus infection. *PLoS Pathog.* 14: e1006884.
- 969
- 970

971 **Figure legends**

972

973 **Figure 1. Zebrafish larva transcriptional response to type I IFN** (A) Fold change (FC)/basal  
974 expression representation with all genes detected in the analysis. Basal expression was the  
975 average of read numbers mapped onto a given gene in control (BSA-injected) larvae. FC is  
976 the ratio of reads numbers in IFN $\phi$ 1-injected larvae divided by basal expression. pVal  
977 corresponds to adjusted p-Value. (B) FC/basal expression representation, limited to ISGs  
978 identified in IFN $\phi$ 1-injected larvae (e.g. red dots in panel A); key genes commented in the  
979 text are indicated with gene families identified by different colors/symbols. (C) FC/basal  
980 expression representation for zebrafish ISGs represented according to the type of orthology  
981 with human genes, and if human orthologues include at least one human ISG. 1-to-1: single  
982 zebrafish gene orthologous to single human gene. Other: other orthology relationships  
983 between zebrafish and human genes (many-to-many, 1-to-many, many-to-1). Vertebrate:  
984 zebrafish gene sharing a common ancestor with a human ISG at the basal or jawed  
985 vertebrate level, but not orthologous. No orthologue: no orthology relationship with a  
986 human gene, and no known common ancestor with human ISG at vertebrate level. Non-ISG:  
987 orthologous human gene(s) do not include any ISG. (D) Fold change distribution for zebrafish  
988 ISG with different types of orthology relationship to human genes, using the same color code  
989 as in C but pooling genes with single and multiple human orthologues. Zebrafish ISGs with a  
990 human ISG within a vertebrate-level orthology groupes were not included in this analysis.

991

992 **Figure 2. Main families of fish-specific ISG and their domain organisation.** Each panel show  
993 the typical domain organization of a family of fish-specific ISGs (e.g., with no human  
994 orthologue), as determined by SMART analysis (<http://smart.embl-heidelberg.de/>). The

995 accession numbers of IFN $\phi$ 1-induced genes (FC>2, pVal<5%) and the fraction they represent  
996 within the family are indicated. Vertical lines represent exon boundaries. Besides named  
997 domains, boxes represent coiled-coil regions (grey), low complexity regions (striped),  
998 transmembrane domains (black), and leader peptides (white).

999

1000 **Figure 3. Comparison of ISG repertoires identified by IFN $\phi$ 1 induction and by CHIKV**

1001 **infection.** (A) Venn analysis of genes up- or down-regulated in zebrafish larva by IFN $\phi$ 1  
1002 treatment (IFN $\phi$ 1), CHIKV infection (ChikV), and CHIKV infection in the context of type I IFN  
1003 receptor knock-down (“MoCrfb”). ISG are identified either by their responsiveness to IFN $\phi$ 1  
1004 or by a CHIKV induction abolished in crfb1+2 morphants (venn diagram at the top). Genes  
1005 induced by CHIKV infection in an IFN $\phi$ 1 independent way are analysed in the Venn diagram  
1006 at the bottom of the panel. (B) FC/FC representation of transcriptome response to IFN $\phi$ 1  
1007 and CHIKV. Color code identifies genes significantly induced by IFN $\phi$ 1 and/or CHIKV, and  
1008 genes which are significantly induced in one condition (FC>2, adj p val< 0.05) while almost  
1009 significantly induced in the other (“quasi Sig”; thresholds FC>1.5 and/or adj p value < 0.2).  
1010 (C) Venn analysis of genes significantly induced by IFN $\phi$ 1 and/or CHIKV. Gene subsets  
1011 corresponding to genes induced quasi-significantly is represented within dotted lines.

1012

1013 **Figure 4. Graphic overview of the ancestral ISG repertoire**, organized by functional  
1014 modules.

1015

1016 **Figure 5. Evolution of the ISG repertoire** since the LCATT (last common ancestor of  
1017 Tetrapods and Teleosts). Genes names are given as examples, with no attempt to be

1018 exhaustive.

1019

1020

**Table 1. Orthology groups defining ancestral ISGs**

| ancestral gene                       | zebrafish                   | human                 |
|--------------------------------------|-----------------------------|-----------------------|
| <b>OSTEICHTYAN-LEVEL ORTHOLOGUES</b> |                             |                       |
| ADAR                                 | adar                        | ADAR                  |
| AHNAK                                | ahnak                       | AHNAK                 |
| APOL                                 | apol                        | APOL1, 2, 3, 6        |
| B2M                                  | b2m,b2ml                    | B2M                   |
| BATF2                                | batf2                       | BATF2                 |
| CASP1                                | caspb                       | CASP1, CASP4          |
| CASP7                                | casps7                      | CASP7                 |
| CCL19                                | ccl19a.1, a.2               | CCL19                 |
| CD40                                 | cd40                        | CD40                  |
| cGAS                                 | cgas                        | CGAS                  |
| CMPK2                                | cmpk2                       | CMPK2                 |
| CXCL11                               | cxcl11.3                    | CXCL11                |
| DDX58 (RIGI)                         | ddx58                       | DDX58                 |
| DHX58 (LGP2)                         | dhx58                       | DHX58                 |
| DTX3L                                | dtx3lb1,2,3                 | DTX3L                 |
| EPSTI1                               | epsti1                      | EPSTI1                |
| FAM111                               | fam111.1                    | FAM111A               |
| FAS                                  | fas                         | FAS                   |
| FPR                                  | fpr                         | FPR2                  |
| GIMAP                                | gimapb1                     | GIMAP2                |
| HELZ2                                | helz2a,b                    | HELZ2                 |
| HERC5/6                              | herc56.1, 2, 3, 4           | HERC5, HERC6          |
| IFI35                                | ifi35                       | IFI35                 |
| IFI44                                | ifi44a1, a5, c2, d, f3-6, g | IFI44, IFI44L         |
| IFIH1 (MDA-5)                        | ifih1                       | IFIH1                 |
| IFIT                                 | ifit8-12, 14-16             | IFIT1-3, 5            |
| IL4i1                                | il4i1                       | IL4I1                 |
| IRF7                                 | irf7                        | IRF7                  |
| IRF9                                 | irf9                        | IRF9                  |
| ISG12                                | isg12.1-4, 6-7              | IFI6, IFI27           |
| ISG15                                | isg15                       | ISG15                 |
| LGALS9                               | lgals9l1, 3                 | LGALS9, 9C            |
| MOV10                                | mov10a, b.1, b.2            | MOV10                 |
| MX                                   | mxa, b, c, e                | MX1, MX2              |
| NAMPT                                | nampta, namptb              | NAMPT                 |
| NCOA7                                | ncoa7a                      | NCOA7                 |
| NLRC5                                | nlrc5                       | NLRC5                 |
| OGFR                                 | ogfr1.2                     | OGFR                  |
| PARP12                               | parp12a,b                   | PARP12                |
| PARP14                               | parp14a,c                   | PARP14                |
| PARP9                                | parp9                       | PARP9                 |
| PHF11                                | phf11                       | PHF11                 |
| PKR                                  | pkz, eif2ak2                | EIF2AK2               |
| PMAIP1                               | pmaip1                      | PMAIP1                |
| PSMB8                                | psmb8a                      | PSMB8                 |
| PTMA                                 | ptmaa                       | PTMA                  |
| PYCARD (ASC)                         | pycard                      | PYCARD                |
| RARRES3                              | rarres3                     | RARRES3               |
| RNF114                               | rnf114                      | RNF114                |
| RNF213                               | rnf213a,b                   | RNF213                |
| RSAD2                                | rsad2                       | RSAD2                 |
| SOCS1                                | socs1a,b                    | SOCS1                 |
| SP100                                | sp100.1, sp100.3, sp100.4   | SP100, 110, 140, 140L |
| STAT1                                | stat1a,b                    | STAT1                 |
| STAT2                                | stat2                       | STAT2                 |
| TAP1                                 | tap1                        | TAP1                  |
| TAP2                                 | tap2a,t                     | TAP2                  |
| TDRD7                                | tdrd7b                      | TDRD7                 |
| TMEM173 (STING)                      | tmem173                     | TMEM173               |
| TRAFD1                               | trafd1                      | TRAFD1                |
| TREX                                 | trex3                       | TREX1                 |
| TRIM25                               | trim25                      | TRIM25                |
| UBA7                                 | uba7                        | UBA7                  |
| USP18                                | usp18                       | USP18                 |
| XAF1                                 | xaf1                        | XAF1                  |
| ZNFX1                                | znfx1                       | ZNFX1                 |
| <b>VERTEBRATE-LEVEL ORTHOLOGUES</b>  |                             |                       |
| CD9                                  | cd9r                        | CD9                   |
| CDKN1                                | cdkn1d                      | CDKN1A                |
| GJ                                   | cx30.3                      | GJA4                  |
| MHC class I                          | mhc1zba                     | HLA-A, -B, -C         |
| SAMD9                                | samd9r                      | SAMD9                 |
| TABPB                                | tabpr1, tabpr2              | TAPBP                 |

Orthology groups that include ISGs in both zebrafish and human, and therefore define an ancestral ISG in their common ancestor. Orthologous genes are produced by speciation (orthogenesis), by opposition to paralogous genes produced by duplication. Thus, an osteichthyan-level orthology group includes human and zebrafish genes with a direct ancestor in the LCATT. Vertebrate level orthologues share this ancestral gene at the basal or jawed vertebrate level. This is a condensed version of Table S5, which also includes non-IFN inducible genes which belong to the osteichthyan-level orthology groups, and provides Ensembl Gene IDs. In red, our gene re-naming proposals.





Figure 2. Domain organisation and main families of fish-specific ISG

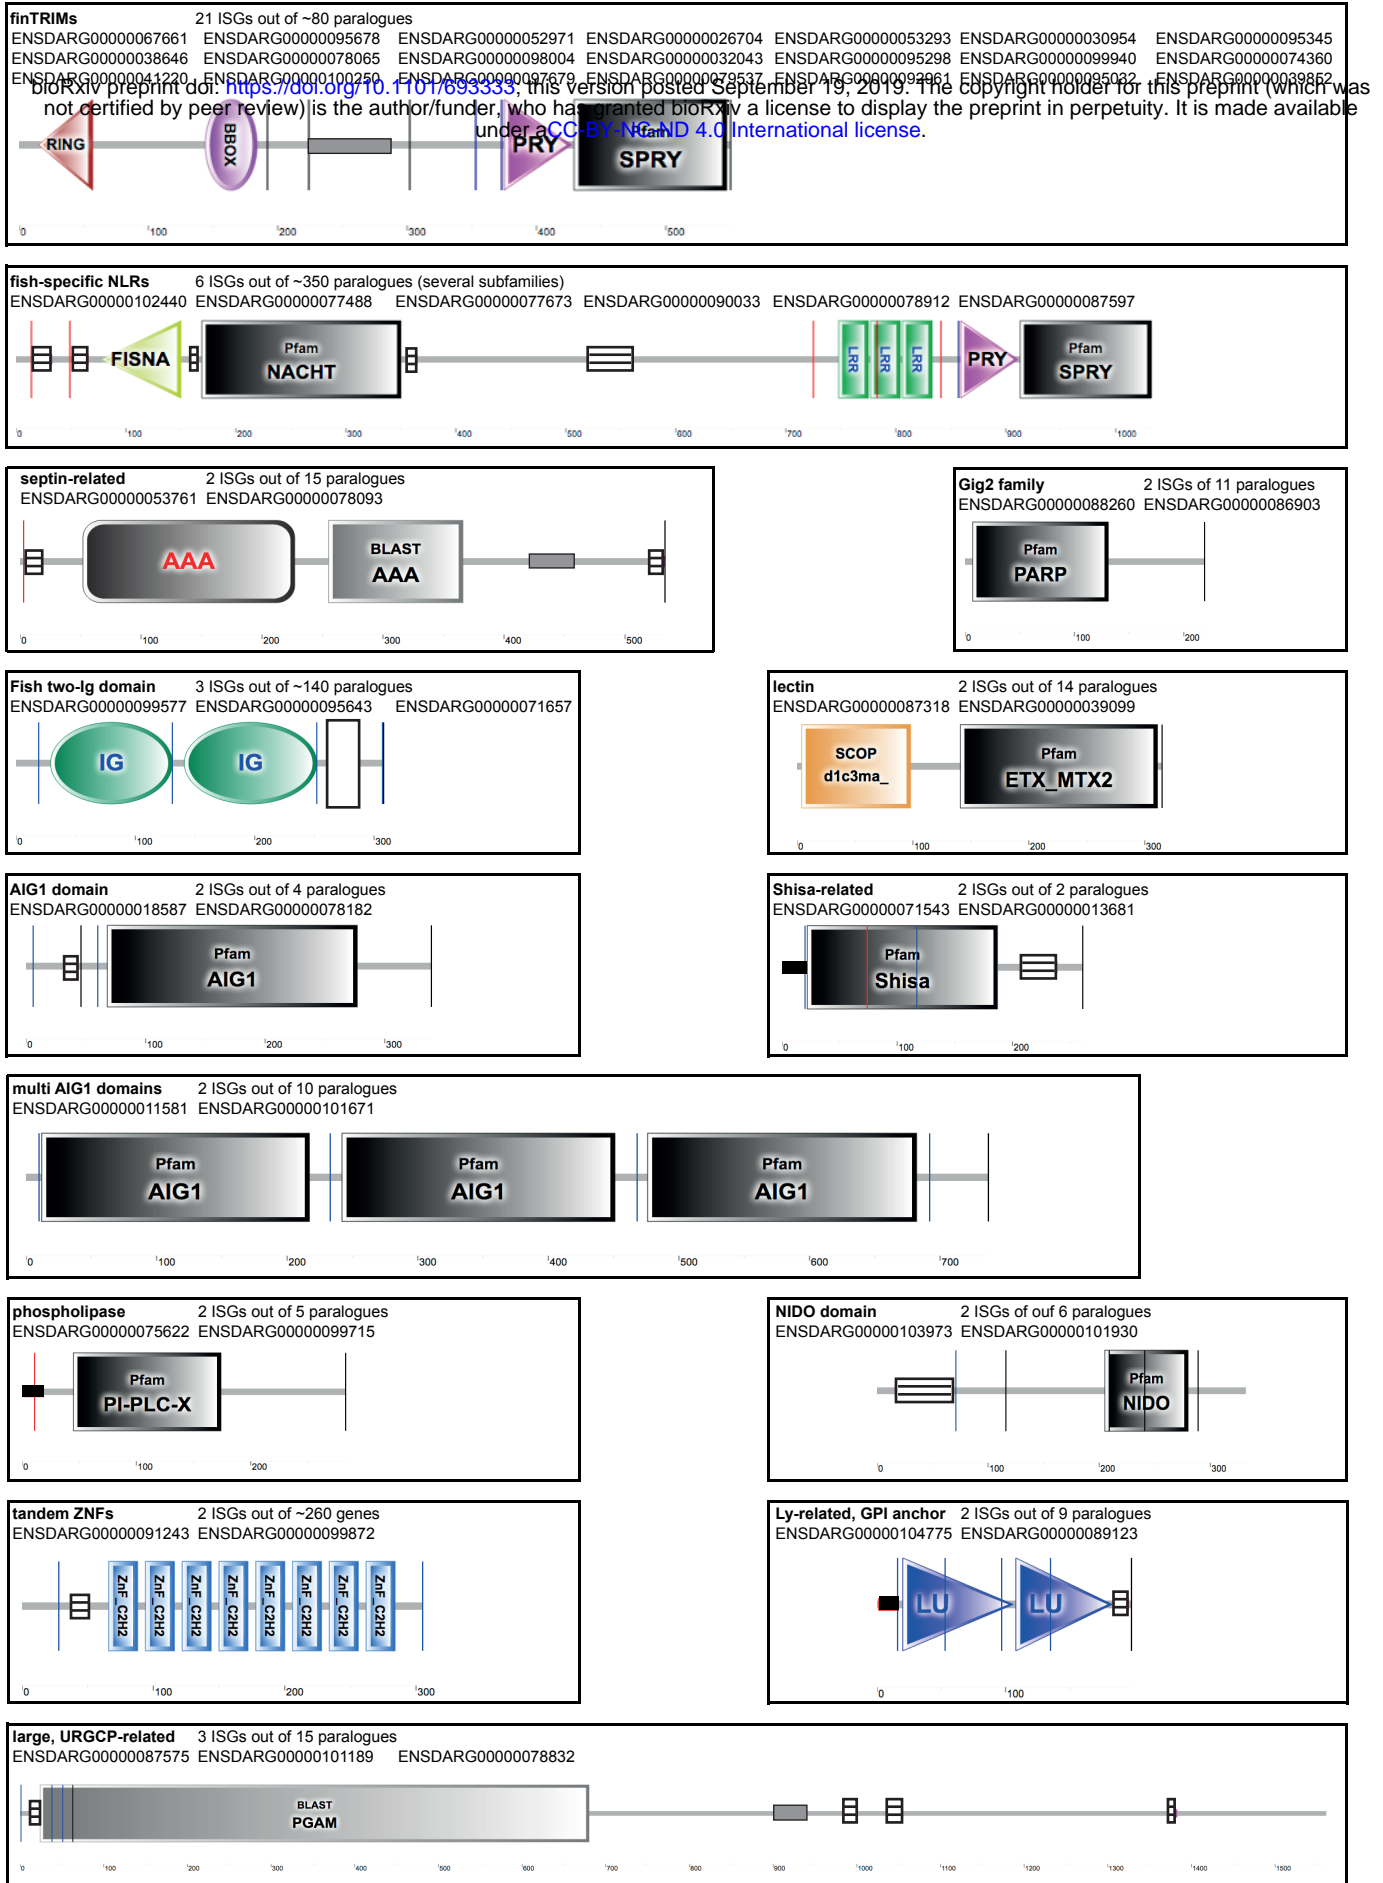

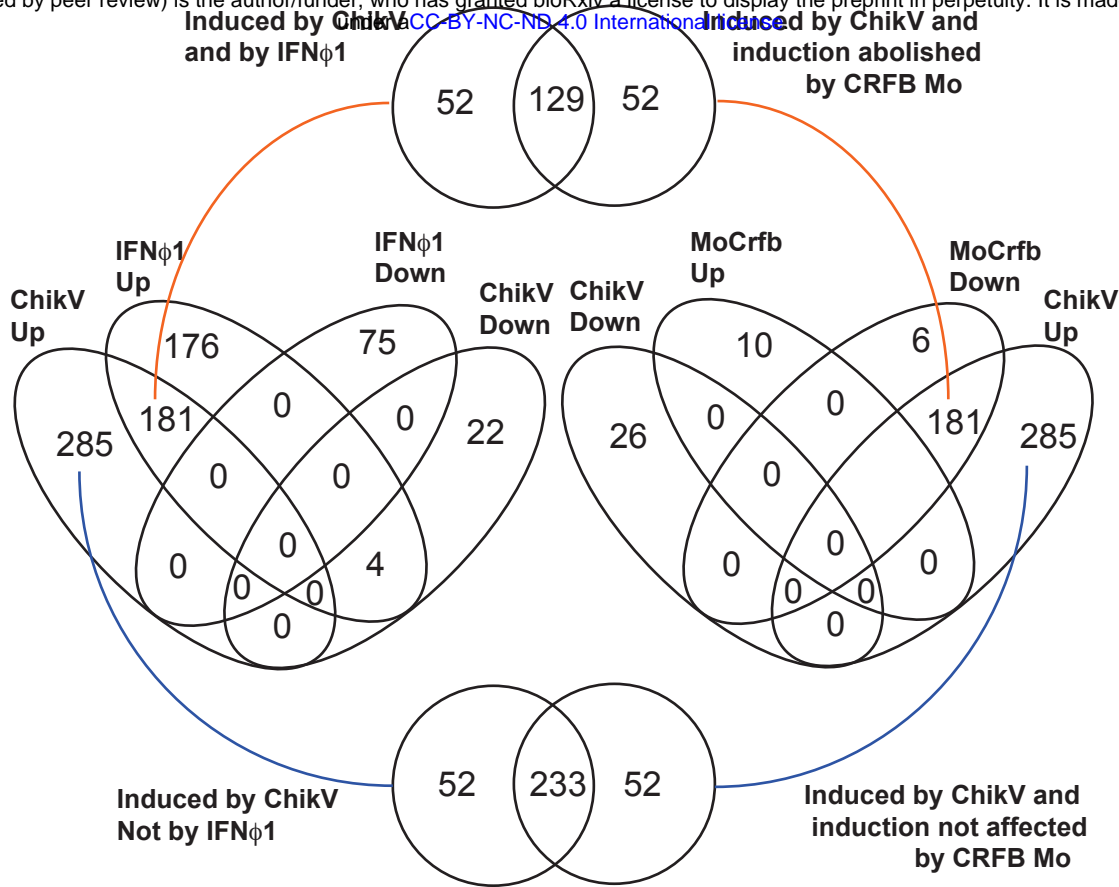

B.

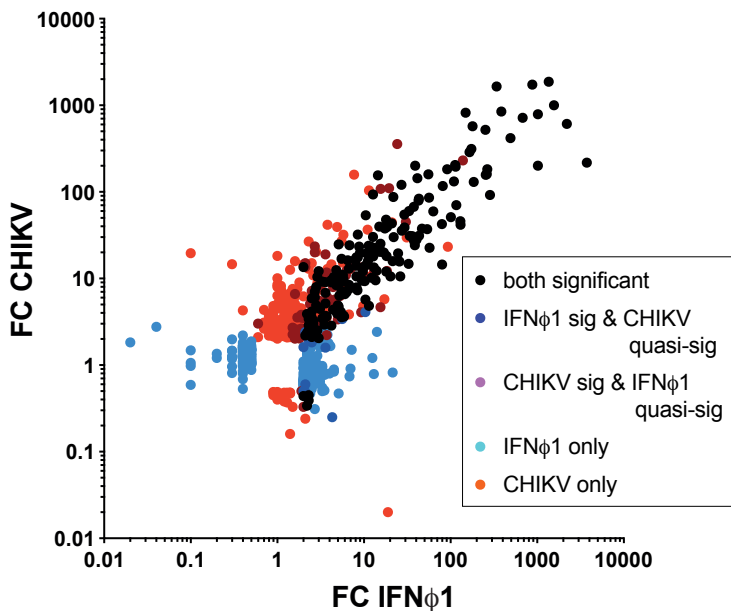

C.

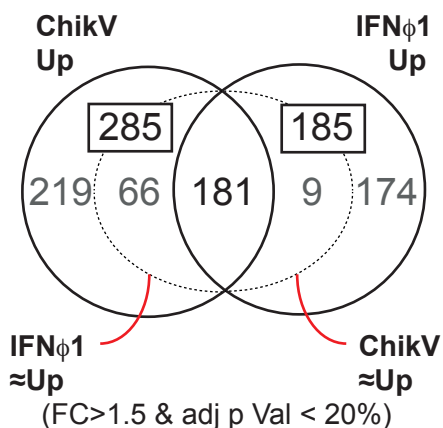

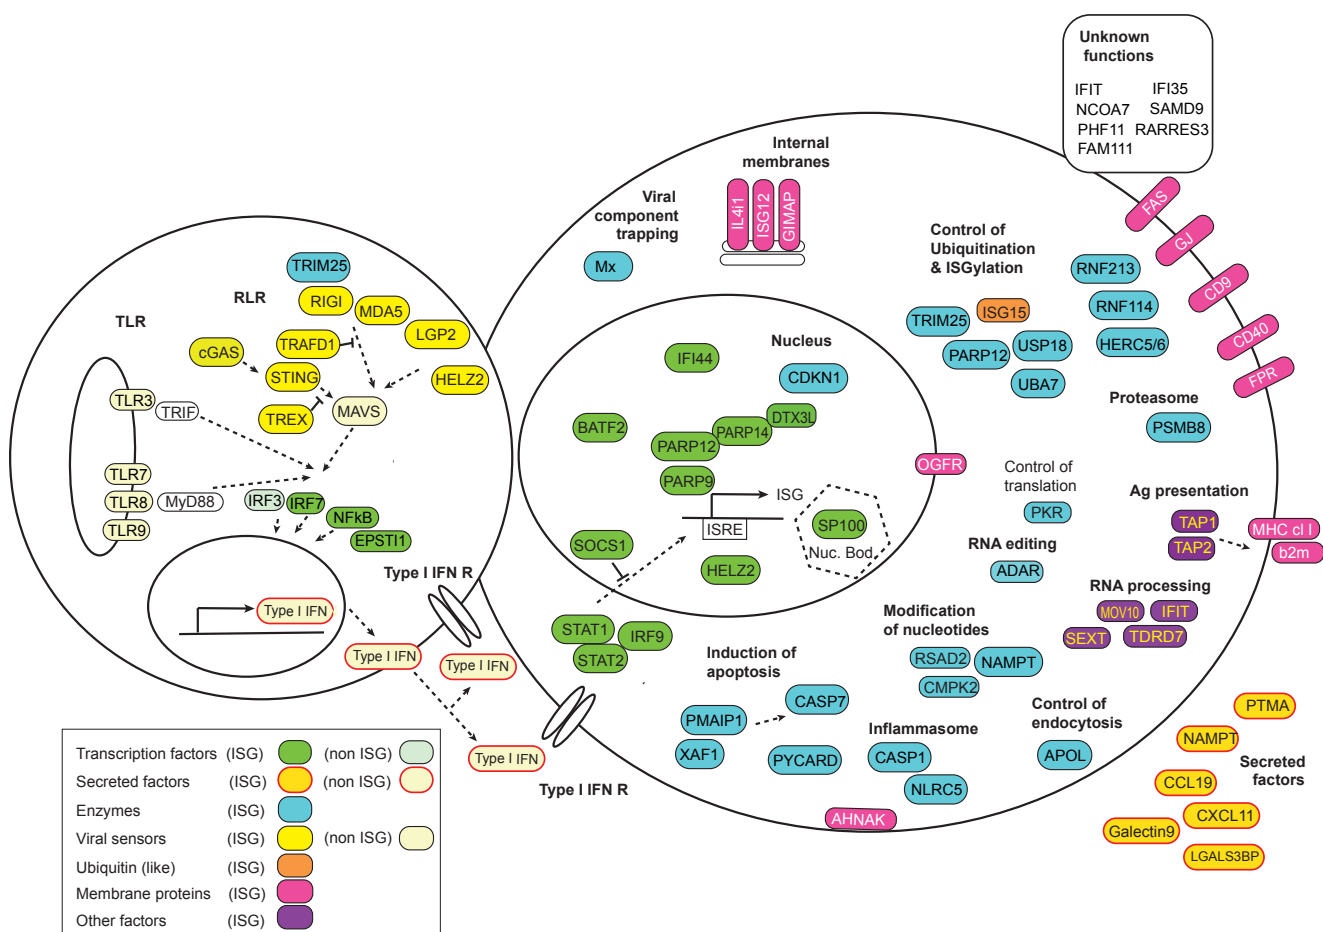

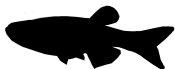

LCATT

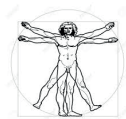

Conserved ISG

**Ancestral ISG maintained in teleosts as single copy:**

*rsad2, trim25, isg15, apol*

**or multiple paralogues:**

*ifi44, mx, isg2, herc5/6, sp100*

**Ancestral ISG maintained in tetrapods as single copy:**

*RSAD2, TRIM25, ISG15*

**or multiple paralogues:**

*APOL, SP100, MX*

Loss and gain of ISG in fish or tetrapods

**Genes present in teleosts and tetrapods but IFN-inducible only in teleosts**

*ctla4 dram1*  
*il4r irf3*  
*nuggc rel, relb*  
*btr vamp8*  
*steap3 casp3*

Loss or gain of inducibility

**Old genes present in teleosts and tetrapods but IFN-inducible only in tetrapods**

*GZMB GPX2*  
*IFNGR1 IRF1*  
*JAK2 JUNB*  
*MyD88 OPTN*  
*SMAD3 IFI30*

**ISG present in teleosts, not in tetrapods**

*gig2*  
*fintrim*  
*fish specific nlr*  
*fish 2-Ig domains*  
*phospholipases*  
*pkz*

Gene loss or gene gain either in fish or in tetrapods

**ISG present in tetrapods, not in teleosts**

*OAS DDX60*  
*APOBEC3 IFNLR1*  
*CLEC4 IL15 & IL15RA*  
*RNaseL ISG2*  
*IDO1 AIM2/IFI16*  
*BST2 TRIM5, 19, 21, 22*
