# Supplementary material for: Interferon-stimulated genes in zebrafish and human define an ancient arsenal of antiviral immunity
Source: bioRxiv or medRxiv preprint supplement (doi:10.1101/693333), 2019-09-19
Supplement: Supplementary file [file media-1.pdf]

Figure S1

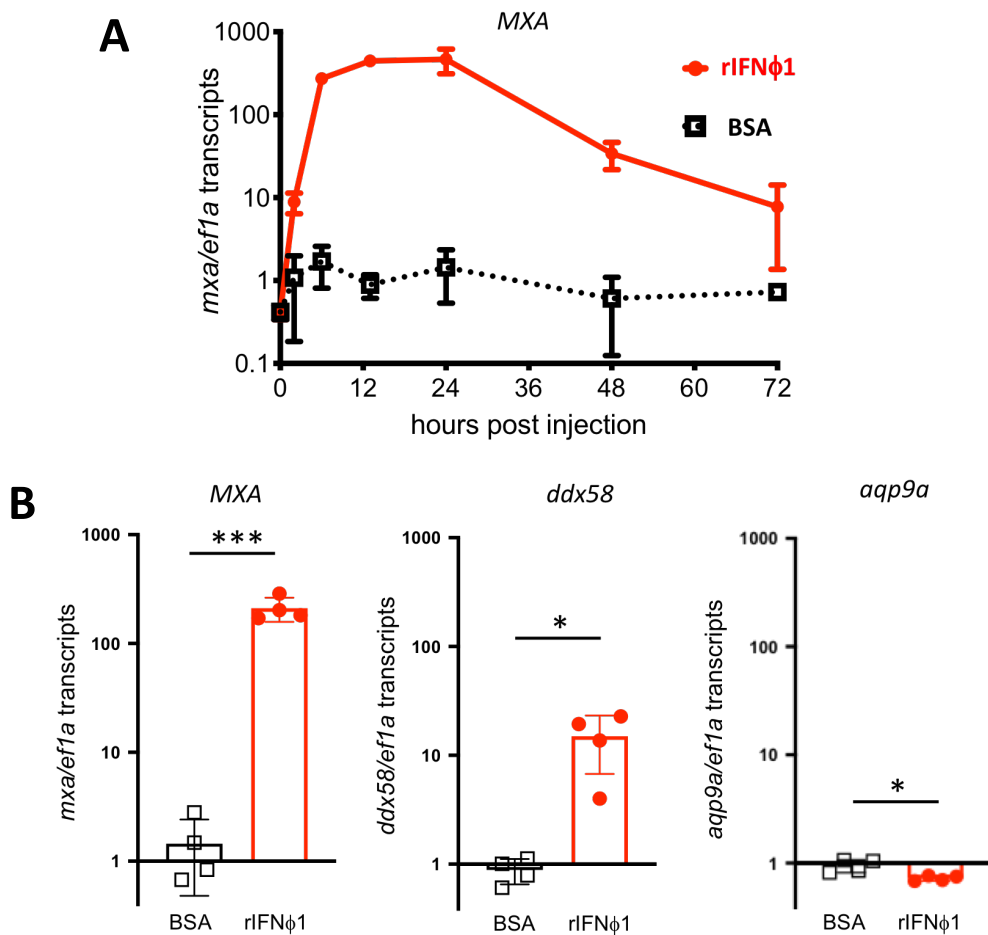

**Figure S1. A. Kinetics of response to recombinant IFN $\phi$ 1**, measured by RT-qPCR. Data normalized on the mean of expression of control (samples), displayed as mean  $\pm$  SD. **B. Genes missing in the reference genome: *ddx58***, encoding RIG-I, is a zebrafish ISG, but ***aqp9a* is not**. qRT-PCR in individual zebrafish larvae 6 hours after IFN $\phi$ 1 injection; quantification of *MXA* also shown as a control.
