# Supplementary material for: Interferon-stimulated genes in zebrafish and human define an ancient arsenal of antiviral immunity
Source: bioRxiv or medRxiv preprint supplement (doi:10.1101/693333), 2019-09-19
Supplement: Supplementary file [file media-2.pdf]

**Figure S2**

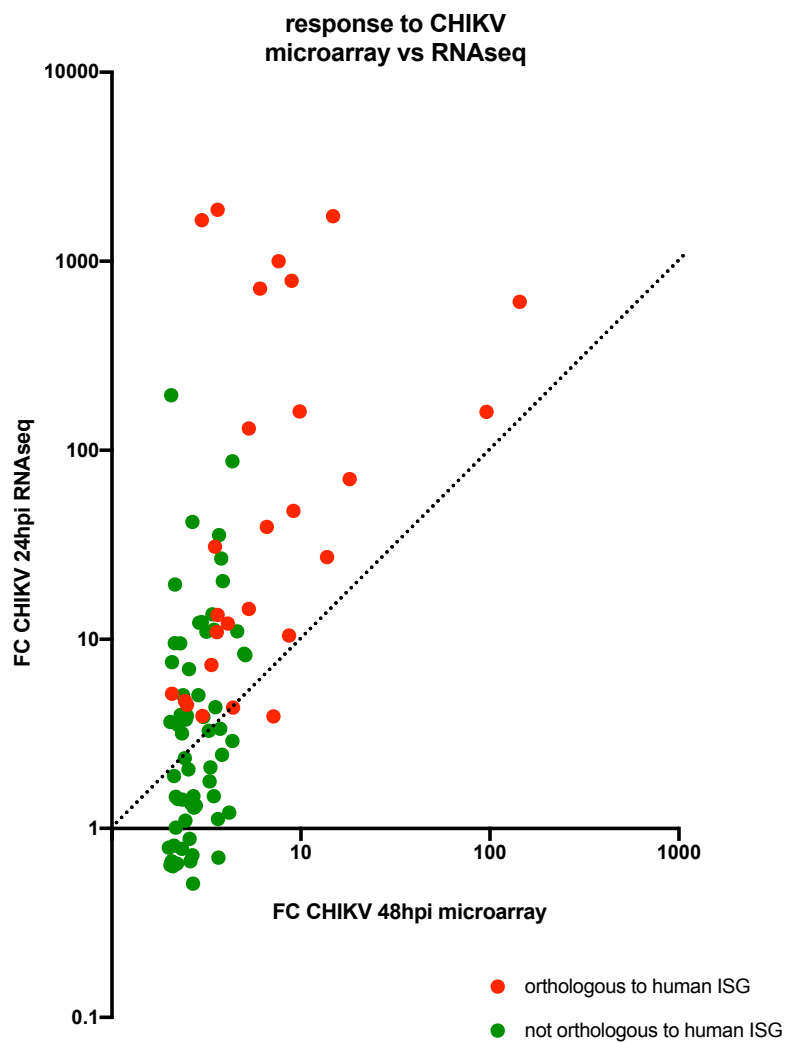

**Figure S2. Transcriptomic response to CHIKV at 24 and 48 hours post infection.** 48h data from (Briolat et al., 2014), 24h data from this study; only genes identified as upregulated in the 2014 microarray study are displayed here.
